**A small proportion of Talin molecules transmit forces  
to achieve muscle attachment *in vivo***

Sandra B. Lemke<sup>1</sup>, Thomas Weidemann<sup>1</sup>, Anna-Lena Cost<sup>1</sup>, Carsten Grashoff<sup>1,2</sup> and Frank Schnorrer<sup>1,3</sup>

<sup>1</sup> Max Planck Institute of Biochemistry, Martinsried, Germany

<sup>2</sup> University of Münster, Institute for Molecular Cell Biology, Münster, Germany

<sup>3</sup> Aix Marseille University, CNRS, IBDM, Marseille, France

Correspondence should be addressed to:

[frank.schnorrer@univ-amu.de](mailto:frank.schnorrer@univ-amu.de) (F.S.)

[grashoff@uni-muenster.de](mailto:grashoff@uni-muenster.de) (C.G.)

[lemke@biochem.mpg.de](mailto:lemke@biochem.mpg.de) (S.B.L.)

Keywords: muscle, attachment site, force, integrin, Talin, *Drosophila*, FRET, tension sensor, FCS;

short title: Measuring molecular forces across Talin *in vivo*

1 Cells in a developing organism are subjected to particular mechanical forces, which  
2 shape tissues and instruct cell fate decisions. How these forces are sensed and  
3 transmitted at the molecular level is thus an important question, which has mainly been  
4 investigated in cultured cells *in vitro*. Here, we elucidate how mechanical forces are  
5 transmitted in an intact organism. We studied *Drosophila* muscle attachment sites,  
6 which experience high mechanical forces during development and require integrin-  
7 mediated adhesion for stable attachment to tendons. Hence, we quantified molecular  
8 forces across the essential integrin-binding protein Talin, which links integrin to the  
9 actin cytoskeleton. Generating flies expressing three FRET-based Talin tension sensors  
10 reporting different force levels between 1 and 11 pN enabled us to quantify  
11 physiologically-relevant, molecular forces. By measuring primary *Drosophila* muscle  
12 cells, we demonstrate that *Drosophila* Talin experiences mechanical forces in cell culture  
13 that are similar to those previously reported for Talin in mammalian cell lines.  
14 However, *in vivo* force measurements at developing flight muscle attachment sites  
15 revealed that average forces across Talin are comparatively low and decrease even  
16 further while attachments mature and tissue-level tension increases. Concomitantly,  
17 Talin concentration at attachment sites increases five-fold as quantified by fluorescence  
18 correlation spectroscopy, suggesting that only few Talin molecules are mechanically  
19 engaged at any given time. We therefore propose that high tissue forces are shared  
20 amongst a large excess of adhesion molecules of which less than 15% are experiencing  
21 detectable forces at the same time. Our findings define an important new concept of how  
22 cells can adapt to changes in tissue mechanics to prevent mechanical failure *in vivo*.

23

## 24 **Introduction**

25 The shape of multicellular organisms critically depends on the presence of mechanical forces,  
26 during development [1,2]. Forces not only generate form and flows within tissues [3,4] but  
27 can also control cell fate decisions [5,6] or trigger mitosis [7]. There are various ways to  
28 quantify forces at the cellular or tissue level [8,9], however mechanical forces experienced by  
29 proteins in cells have only recently become quantifiable with the development of Förster  
30 Resonance Energy Transfer (FRET)-based molecular tension sensors [10]. These sensors  
31 contain a donor and an acceptor fluorophore connected by a mechano-sensitive linker peptide,  
32 which reversibly unfold and extend when experiencing mechanical forces. As a result, such  
33 sensors report forces as a decrease in FRET efficiency resulting from an increase in distance  
34 between the fluorophores. Since previous studies analysed molecular forces using *in vitro* cell  
35 culture systems [11-16] and insights from *in vivo* experiments are still limited [17-20], it  
36 remains largely open how mechanical loads are processed at the molecular level in tissues of  
37 living organisms.

38 Integrins are a major and highly conserved force bearing protein family. They connect  
39 the actomyosin cytoskeleton to the extracellular matrix and are essential for numerous  
40 mechanically regulated processes *in vivo* or *in vitro* [21,22]. However, *in vivo* it is particularly  
41 unclear how integrin-based structures are mechanically loaded since forces have so far been  
42 analysed in focal adhesions, which typically are not found in soft tissues [11-13,16].  
43 Therefore, we chose to investigate *Drosophila* muscle attachment sites *in vivo*, which  
44 experience high mechanical forces during development [23] and depend on integrin-based  
45 attachment of muscle fibers to tendons cells [21,24]. For the molecular force measurements  
46 we selected the integrin activator and mechanotransducer Talin, which is essential for all  
47 integrin mediated functions and binds with its globular head-domain to the tail of  $\beta$ -integrin  
48 and with its rod-domain to actin filaments [25,26]. Thus, Talin is in the perfect position to  
49 sense mechanical forces across integrin-dependent adhesive structures. Surprisingly, we find

50 that less than 15% of the Talin molecules experience significant forces at muscle attachments  
51 *in vivo* suggesting that high tissue forces are rather sustained by recruiting a large excess of  
52 Talin molecules to muscle attachments. This may have important impact for the robustness of  
53 muscle attachment under peak mechanical load in muscles.  
54

55 **Results**

56 **A *Drosophila* Talin tension sensor**

57 To enable quantitative force measurements, we generated various *Drosophila* Talin tension  
58 sensor and control flies by modifying the endogenous *talin (rhea)* gene using a two-step  
59 strategy based on CRISPR/Cas9 genome engineering and  $\phi$ C31-mediated cassette exchange  
60 (Fig. 1a, Extended data Fig. 1) [27]. This strategy enabled us to generate an entire set of Talin  
61 tension sensor fly lines with YPet and mCherry (mCh) FRET pairs and three different  
62 mechano-sensitive linker peptides [11,13], Flagelliform (F40), Villin headpiece (HP) and its  
63 stable variant (HPst), reporting forces of 1-6 pN, 6-8 pN and 9-11 pN, respectively (Fig. 1b).  
64 The sensor modules were inserted both internally between the Talin head- and rod-domains  
65 (F40-TS, TS, stTS) at the analogous position used in mammalian Talin to report forces *in*  
66 *vitro* [11,16], and C-terminally as a zero-force control (C-F40-TS, C-TS, C-stTS).  
67 Furthermore, the individual fluorescent proteins were inserted at both positions as controls  
68 (I-YPet, I-mCh, C-YPet, C-mCh). Importantly, all stocks are homozygous viable, fertile and  
69 do not display any overt phenotype indicating that the Talin tension sensor proteins are  
70 functional.

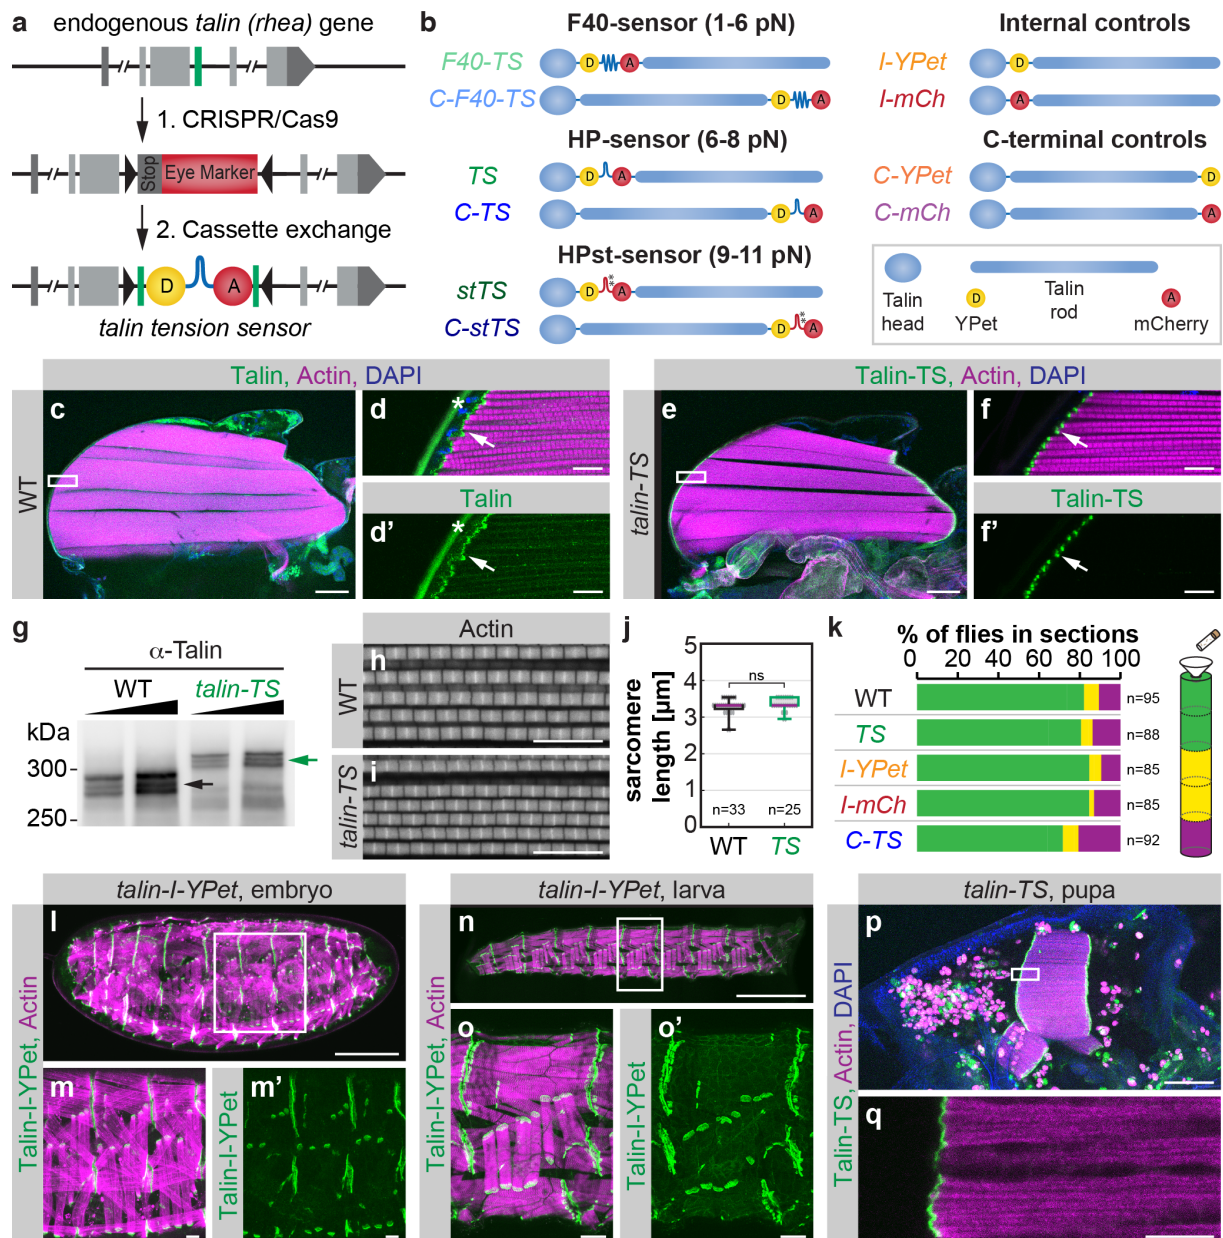

71

72 **Fig. 1 | Talin tension sensor generation and verification.** **a**, 2-step genome engineering strategy of the *talin*  
 73 (*rhea*) gene. Step 1: Cas9-mediated insertion of an eye marker cassette replacing the target exon (green). Step 2:  
 74  $\phi$ C31-mediated cassette exchange restoring the original exon and including a tension sensor. See Extended Data  
 75 Fig. 1 for details. **b**, Overview of Talin tension sensor and control flies. Sensors with three different mechano-  
 76 sensitive linker peptides, F40, HP and HPst, were generated. Respective force regimes are indicated. Each sensor  
 77 was inserted internally (F40-TS, TS, stTS) or at the C-terminus (C-F40-TS, C-TS, C-stTS). Individual  
 78 fluorescent protein controls were also generated (I-YPet, I-mCh, C-YPet, C-mCh). **c-d**, Wild-type (WT) adult  
 79 hemithorax stained with Talin antibody, phalloidin (Actin) and DAPI. White box in **c** indicates zoom-in area  
 80 shown in **d** and **d'**. Note the Talin localization at myofibril tips (arrow). The star indicates background  
 81 fluorescence from the cuticle. **e-f**, *talin* tension sensor (*talin-TS*) adult hemithorax showing Talin-TS localization  
 82 at myofibril tips (arrow). **g**, Western blot of whole fly extract from WT and *talin-TS* flies probed with Talin  
 83 antibody. Note the up-shift of all Talin-TS bands (green arrow) compared to WT (black arrow). **h-j**, Phalloidin  
 84 stainings of adult hemithoraxes showing normal sarcomere morphology in WT (**h**) and *talin-TS* (**i**) flies and  
 85 normal sarcomere length (**j**) (Mann Whitney test, ns=not significant,  $p=0.40$ ,  $n$ =number of flies). **k**, Flight test  
 86 (two-way ANOVA, no significant differences compared to WT in 6 replicates,  $n$ =total numbers of flies). **l-q**,  
 87 Talin-I-YPet or Talin-TS expression at different stages of development. Live images of a stage 17 *Talin-I-YPet*  
 88 embryo (**l-m**) and an L3 larva (**n-o**) co-expressing *Mef2-GAL4*, *UAS-mCherry-Gma* as a muscle actin marker.  
 89 (Since the actin marker contains mCherry we used Talin-I-YPet here). A 32 h APF *talin-TS* pupa (**p-q**) stained  
 90 with phalloidin and DAPI. Scale bars are 100  $\mu$ m in **c**, **e**, **l**, **o** and **p**, 10  $\mu$ m in **d**, **f**, **m** and **q**, and 1 mm in **n**.

91

92 To assess the functionality of the Talin tension sensor protein (Talin-TS) more rigorously, we  
93 first analysed Talin-TS localization in adult hemi-thoraxes and found that Talin-TS localizes  
94 to myofibril tips as expected (Fig. 1c-f). Second, we performed western blot analysis to  
95 ensure that the tension sensor module is incorporated into Talin protein isoforms as designed  
96 (Fig. 1g). Third, we quantified sarcomere length in flight muscles and found the expected  
97 length of 3.2  $\mu\text{m}$  in wild type (WT) [28] and *taln-TS* flies (Fig. 1h-j). Fourth, we tested flight  
98 ability [29] and found that the insertion of neither the sensor module or the individual  
99 fluorescent proteins into the internal position nor the sensor module at the C-terminus caused  
100 flight defects (Fig. 1k). Finally, we confirmed that Talin-TS (or Talin-I-YPet) is expressed  
101 correctly at all developmental stages (embryo, larva and pupa) and is detected most  
102 prominently at muscle attachment sites as previously reported for endogenous Talin (Fig. 1l-  
103 q) [30]. Together, these data demonstrate that the tension sensor module is properly  
104 incorporated into Talin and the resulting protein is functional. This permits the quantification  
105 of mechanical tension across Talin in any tissue and at any developmental stage of  
106 *Drosophila in vivo*.

107

### 108 **Forces across *Drosophila* Talin in primary muscle fiber cultures**

109 To ensure that our approach is comparable to previous Talin force measurements in cultured  
110 mammalian cells, we established muscle fiber cultures by incubating primary myoblasts *in*  
111 *vitro* for 5-7 days [31,32]. Isolated myoblasts from *taln-I-YPet* embryos differentiated into  
112 striated, often multinucleated muscle fibers and efficiently adhered to the underlying plastic  
113 substrate (Fig. 2a, b). In these cells, Talin-I-YPet localises to adhesions at the fiber tips and at  
114 myofibril ends as well as to costameres, which connect myofibrils at the sarcomeric Z-discs to  
115 the cell membrane [33]. Primary muscle fibers generated from *taln-I-YPet*, *taln-TS* and  
116 *taln-C-TS* embryos display similar morphologies (Fig. 2c-e) and contract spontaneously

117 (Supplementary Video 1). Adhesions at the fiber tips do not move during these contractions  
 118 while costameres are mobile and thus not fixed to the plastic substrate (Fig. 2f).

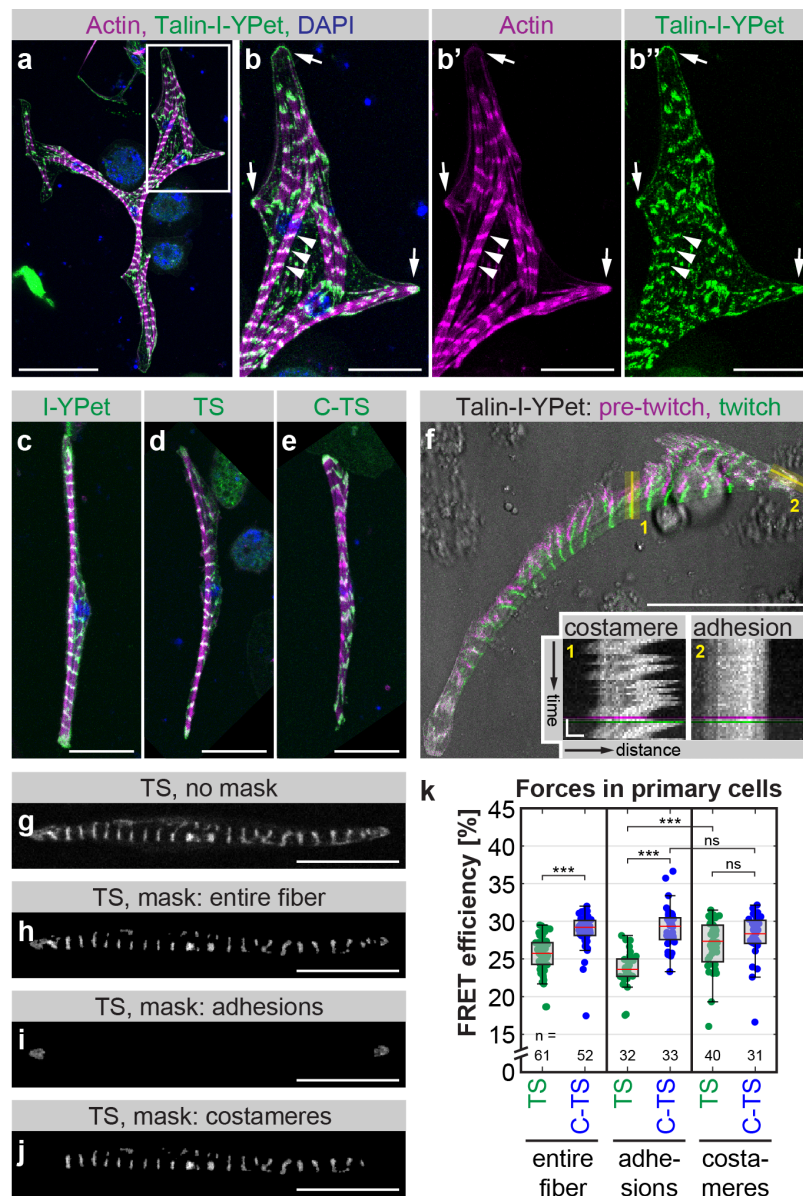

119

120 **Fig. 2 | Talin tension sensor reveals forces in primary muscle fibers.** a-b, Primary myoblasts isolated from  
 121 *tal*-I-YPet embryos were differentiated and stained with phalloidin and DAPI on day 6. White box in a  
 122 indicates zoom-in area in b. In differentiated muscle fibers Talin-I-YPet localizes to adhesions at fiber tips  
 123 (arrows) and to costameres along myofibrils (arrowheads). c-e, Primary muscle fibers differentiated from  
 124 *tal*-I-YPet, *tal*-TS, or *tal*-C-TS embryos stained with phalloidin (magenta) and DAPI (blue) show similar  
 125 morphologies and Talin localisation (green). f, Transmission light image (grey) of a twitching primary muscle  
 126 cell overlaid with Talin-I-YPet signal pre-twitch (magenta) and during the twitch (green), and kymographs of the  
 127 regions indicated in yellow. Note that costameres move with contractions while adhesions are fixed to the  
 128 substrate. g-j, Masking of cells for force analysis. From the original image (g) masks from the entire fiber (h),  
 129 from adhesions at fiber tips (i) or from costameres (j) were created. k, Talin forces measured by FLIM-FRET. A  
 130 decrease in FRET efficiency of Talin-TS (TS) compared to the C-terminal zero-force control (C-TS) indicates  
 131 force. Note that Talin in adhesions experiences a significant amount of force while Talin in costameres does not  
 132 (Kolmogorov-Smirnov test, \*\*\*  $p < 0.001$ , ns=not significant  $p > 0.05$ ; n=number of fibers). Scale bars are 50  $\mu$ m  
 133 in a and f and 20  $\mu$ m in b-e and g-j. Scale bars in kymographs in f are 10 s and 2  $\mu$ m.



134 For establishing force measurements using these primary fiber cultures, we performed  
135 fluorescence lifetime imaging microscopy (FLIM) to determine the FRET efficiency of the  
136 Talin tension sensor containing the HP sensor module (TS) compared to the zero-force  
137 control (C-TS). We created distinct masks for Talin FRET signals either in the entire fiber, or  
138 only in cell-substrate adhesions at the fiber tips, or in costameres along myofibrils (Fig. 2g-j).  
139 Consistent with earlier Talin force measurements, we observed a reduction in FRET  
140 efficiency of TS compared to the control C-TS within the entire fiber, indicating that Talin  
141 indeed experiences mechanical forces in these adherent, primary muscle fibers. As expected,  
142 we find higher average forces across Talin at muscle-substrate adhesions compared to the rest  
143 of the cell. In costameres, which are not fixed to the plastic substrate, the FRET efficiency of  
144 TS is indistinguishable from the control, indicating that forces across Talin at costameres are  
145 lower and do not exceed 6-8 pN. Together, these data demonstrate that the *Drosophila* Talin  
146 tension sensor reports similar Talin forces at adhesions of cultured muscle fibers as were  
147 previously described for Talin in focal adhesions of mammalian fibroblasts [11,12,16].

148

#### 149 **Forces across *Drosophila* Talin *in vivo***

150 To quantify forces across Talin *in vivo*, we chose the developing muscle-tendon attachments  
151 of the flight muscles as a model system. At 20 hours after puparium formation (h APF), the  
152 developing myotubes have initiated contact with the tendon epithelium and immature muscle  
153 attachment sites are formed (Fig. 3a). At 24 h APF, the attachment sites have started to  
154 mature while the myotubes compact and long cellular extensions from the tendon epithelium  
155 are formed. During this process, increasing mechanical tension is build up in the tissue [23].  
156 At 30 h APF, the myotubes reach their maximally compacted stage and initiate  
157 myofibrillogenesis, before the muscles elongate and grow to fill the entire thorax by the end  
158 of the pupal stage [28]. Since muscle attachment critically depends on integrins and Talin

159 function to resist tissue tension [23,30], it is an ideally suited developmental system to  
160 investigate molecular forces across Talin *in vivo*.

161 We measured Talin forces between 18 and 30 h APF in living pupae at the anterior  
162 muscle attachment sites of the dorsal-longitudinal flight muscles using the HP-sensor module  
163 (Fig. 3b and workflow in Extended Data Fig. 2). For calculating the FRET efficiency, we  
164 determined the donor fluorescence lifetime in flies expressing YPet alone at the internal  
165 position of Talin (I-YPet) (Extended Data Fig. 3a). In addition, we excluded the possibility  
166 that FRET between neighbouring molecules (intermolecular FRET) affects our measurements  
167 throughout the entire time course (Extended Data Fig. 3b) and confirmed that our lifetime  
168 measurements are independent of signal intensity (Extended Data Fig. 3c). When we  
169 compared FRET efficiencies in *taln-TS* and *taln-C-TS* animals, we detected a significant  
170 drop in FRET efficiency for Talin-TS at 18-28 h APF. However, the FRET efficiency  
171 reduction at muscle attachment sites was significantly smaller compared to the *in vitro*  
172 measurements of cultured muscle fibers (Fig. 2k) or of cultured mammalian fibroblasts [11].  
173 At 30 h APF, no difference in FRET efficiencies was detected, suggesting that there is little or  
174 no tension across Talin at this time point. Together, these data suggest either that forces per  
175 Talin molecule are largely below 6-8 pN or that only a small percentage of Talin molecules at  
176 muscle attachments experience forces above 6 pN at 18-28 h APF. Contrary to our  
177 expectation, the average force across Talin decreases during muscle compaction when tissue  
178 tension is known to build up and myofibrils are assembled.

179

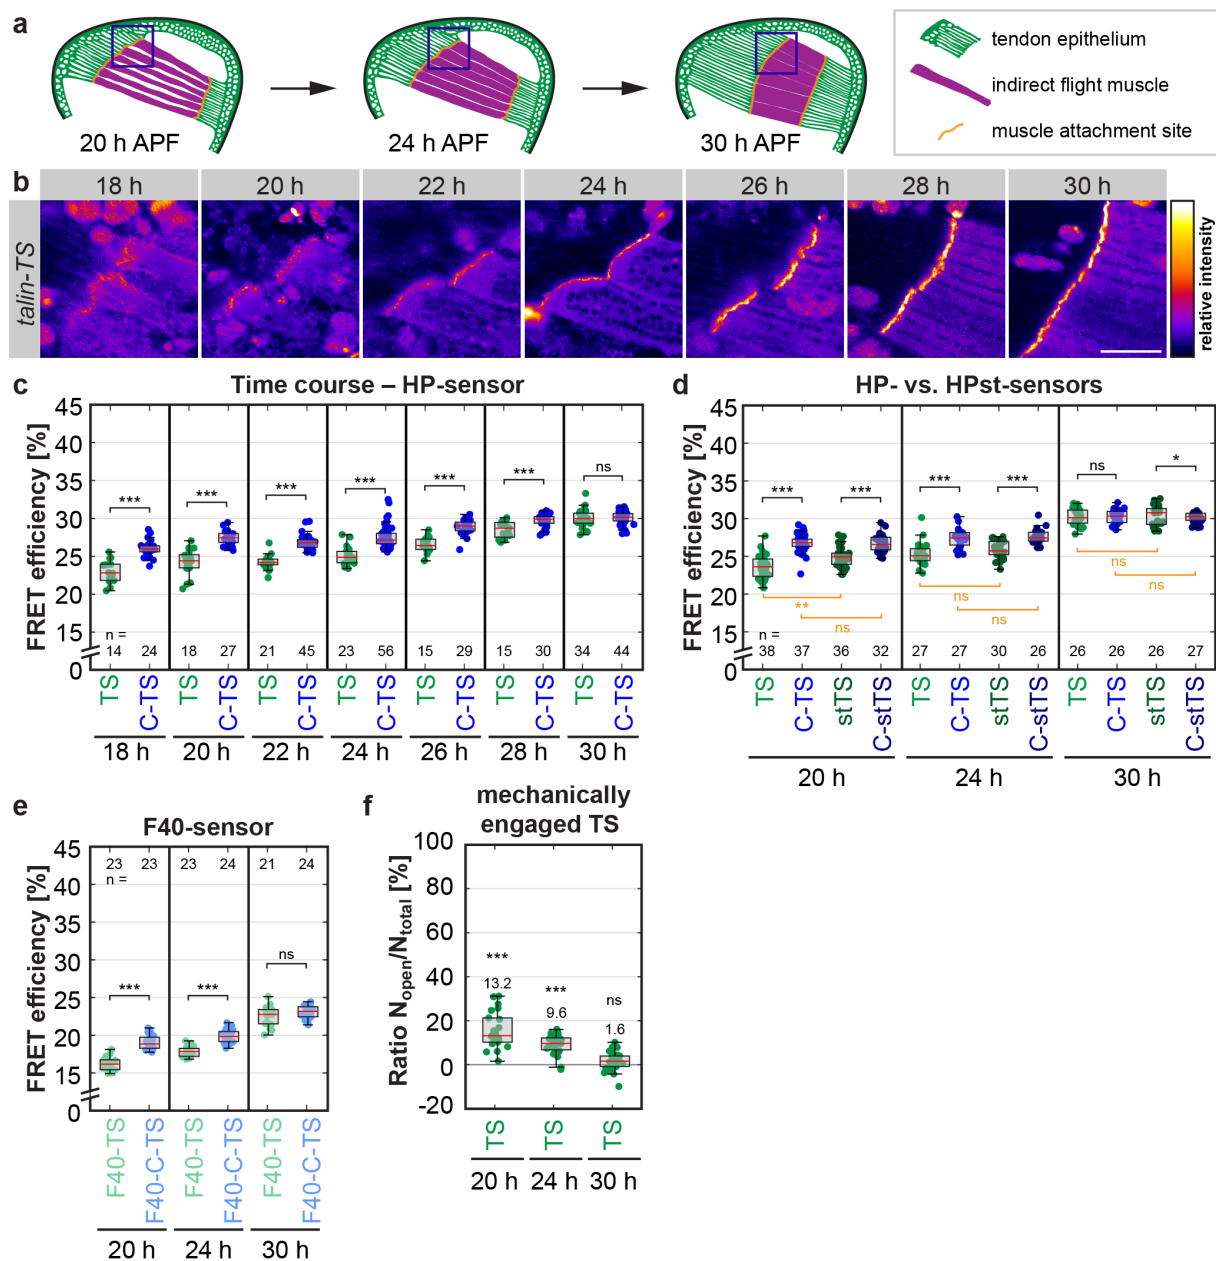

180

181 **Fig. 3 | A small proportion of Talin molecules at muscle attachment sites *in vivo* are mechanically engaged.**  
 182 **a**, Schemes of indirect flight muscle development in the pupal thorax at 20, 24 and 30 h APF. Blue boxes  
 183 indicate areas imaged for force measurements (see **b**). **b**, Images showing Talin tension sensor (TS) localization  
 184 to maturing muscle attachment sites. Scale bar is 50  $\mu$ m. **c**, Talin forces measured by FLIM-FRET in a time  
 185 course using the HP-sensor module (6-8 pN). A decrease in FRET efficiency of Talin-TS (TS) compared to the  
 186 C-terminal zero-force control (C-TS) indicates force. Note that the average force per molecule is highest in the  
 187 beginning of the time course. **d**, Comparison of TS (6-8 pN) and stTS (9-11 pN) to the C-terminal zero-force  
 188 controls, C-TS and C-stTS. Note that both sensors indicate forces across Talin at 20 h and 24 h APF  
 189 (significance indicated in black). Direct comparisons between TS and stTS or the controls are indicated in  
 190 orange. Note the increase in FRET of stTS compared to TS at 20 h APF. **e**, Talin force measurements using the  
 191 F40-sensor module (1-6 pN). **f**, Proportion of mechanically engaged TS determined as the ratio of open ( $N_{\text{oper}}$ )  
 192 vs. total sensor ( $N_{\text{total}}$ ) using biexponential fitting. Significance is indicated in comparison to zero-force control  
 193 level (set to zero). The raw data are the same as in **c**. (Kolmogorov-Smirnov test, \*\*\* p < 0.001, \*\* p < 0.01, \*  
 194 p < 0.05, ns = not significant p > 0.05; n = number of pupae).

195 To substantiate these findings, we compared flies carrying the HP-based Talin sensor  
196 (6-8 pN) to those with the stable variant HPst (9-11 pN), which only differs in two point  
197 mutations. We found similar and highly reproducible differences in FRET efficiency (Fig. 3d,  
198 Extended Data Fig. 3d) indicating that at 20-24 h APF, some Talin molecules experience  
199 forces of even  $\geq 10$  pN at muscle attachment sites. Importantly, comparison of TS to its stable  
200 variant (stTS) revealed a significant difference in FRET efficiency at 20 h APF while the  
201 respective zero-force controls were indistinguishable (Fig. 3d). This demonstrates that a  
202 proportion of the mechanically engaged Talin molecules experience a range of forces between  
203 7 and 10 pN at muscle-tendon attachments *in vivo*, further emphasizing that the observed  
204 differences are force-specific.

205 To test whether the remaining Talin molecules experience forces that are too low to be  
206 detected by the HP or HPst sensor modules, we generated flies with the F40 sensor module,  
207 which is sensitive to forces of 1-6 pN [13]. Again, we quantified a decrease in FRET  
208 efficiency relative to the control at 20 h and 24 h APF but FRET efficiency differences  
209 remained small and no change was observed at 30 h APF (Fig. 3e). Thus, a large proportion  
210 of the Talin molecules at muscle attachment sites are not exposed to significant mechanical  
211 forces during development.

212 To quantify the proportion of mechanically engaged Talin molecules at 20 h and  
213 24 h APF, we applied biexponential fitting to our FLIM data and calculated the ratio of open  
214 vs. closed sensor (Fig. 3f, see methods for details). This analysis revealed that only 13.2% and  
215 9.6% of all Talin molecules are mechanically engaged at 20 h and 24 h APF, which contrasts  
216 *in vitro* measurements of focal adhesions that are characterized by a Talin engagement ratio of  
217 about 70% [12].

218

219

220

## 221 **Talin concentration at developing muscle attachments**

222 Since Talin is thought to play an important mechanical role during tissue formation, we  
223 wanted to test whether such a small proportion of mechanically engaged Talin molecules *in*  
224 *vivo* could still contribute a significant amount of tissue-level tension. We therefore quantified  
225 the absolute amount of Talin molecules present at muscle attachment sites by combining *in*  
226 *vivo* fluorescence correlation spectroscopy (FCS) with quantitative confocal imaging (see  
227 workflow in Extended Data Fig. 4a-d). From FCS measurements in the muscle interior we  
228 calculated the counts per particle (CPP) value, i.e. the molecular brightness of a single  
229 Talin-I-YPet particle in each pupa. Since such a particle may correspond to a Talin monomer  
230 or dimer, we compared the Talin-I-YPet brightness to the brightness of free monomeric YPet  
231 expressed in flight muscles and found no significant difference (Fig. 4a). We conclude that  
232 Talin is mostly monomeric in the muscle interior.

233 Next, we calculated the Talin concentration at muscle attachment sites by calibrating  
234 confocal images using the molecular brightness (CPP) information from the FCS  
235 measurements. Using a dilution series of Atto488, we ascertained that the fluorescence  
236 intensity increases linearly with the concentration over multiple orders of magnitude in our  
237 measurements (Extended Data Fig. 4e). The resulting images with pixel-by-pixel Talin  
238 concentration values (Fig. 4b) indicate an average concentration at the muscle attachment of  
239 5.9  $\mu\text{M}$  (20 h), 10.9  $\mu\text{M}$  (24 h) and 30.9  $\mu\text{M}$  (30 h) (Fig. 4c). Thus, the local concentration of  
240 Talin molecules increases approximately two-fold from 20 h to 24 h and five-fold to 30 h,  
241 indicating that Talin may contribute to the overall increase in tissue stress by its strong  
242 recruitment to maturing muscle attachment sites.

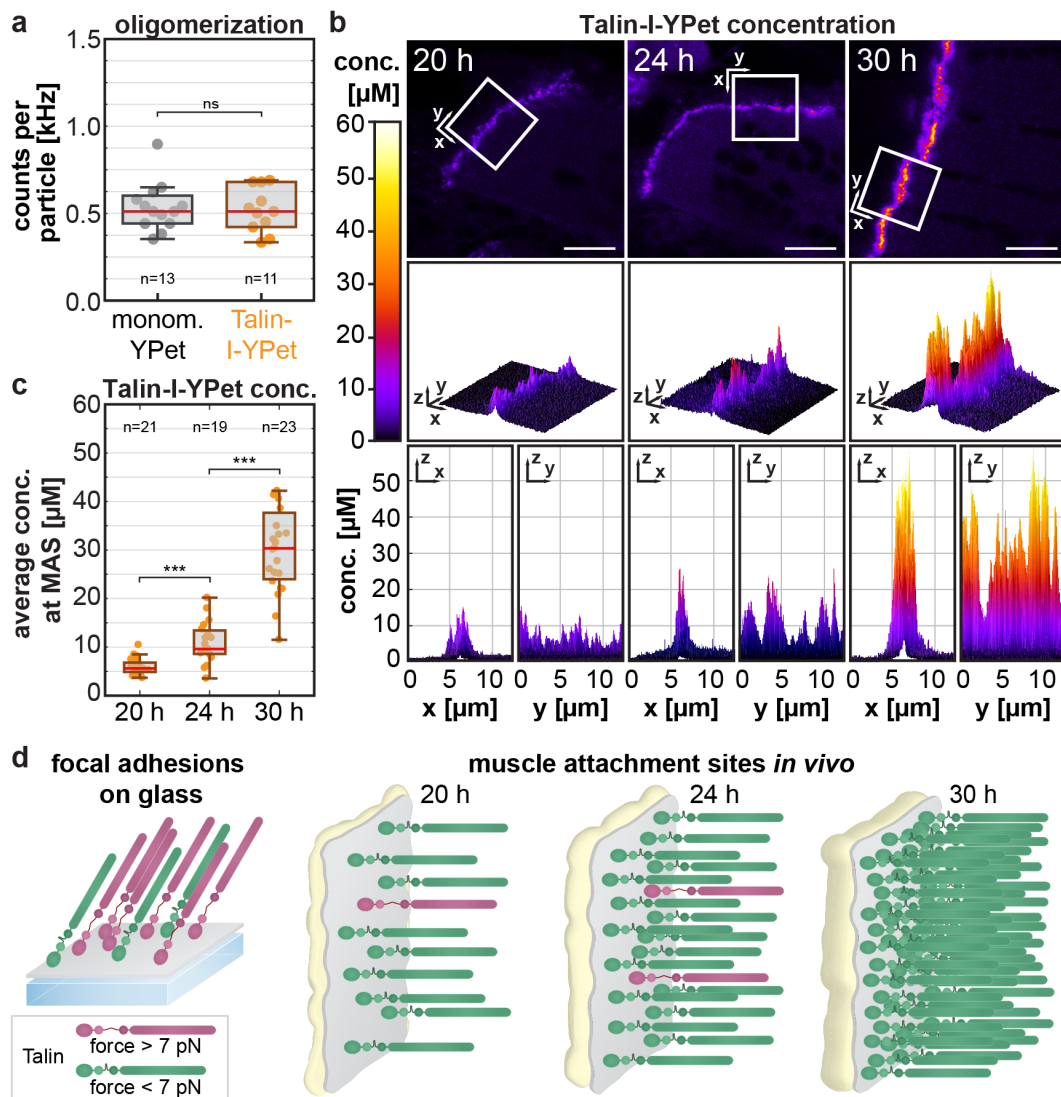

243

244 **Fig. 4 | Talin concentration at muscle attachment sites increases five-fold during attachment maturation.**  
 245 **a**, Degree of Talin oligomerization measured by *in vivo* fluorescence correlation spectroscopy (FCS) in the  
 246 muscle interior. Brightness (in counts per particle) of monomeric free YPet compared to Talin-I-YPet particles.  
 247 Note that Talin-I-YPet particles are as bright as monomeric YPet, thus Talin-I-YPet is also monomeric  
 248 (Kolmogorov-Smirnov test, ns=not significant  $p=0.976$ ,  $n$ =number of pupae). **b**, Absolute Talin-I-YPet  
 249 concentration (conc.) measured by FCS in combination with quantitative confocal imaging. Representative  
 250 calibrated concentration images are shown for 20, 24 and 30 h APF. The boxes mark the area shown in the  
 251 graphs below from different perspectives as indicated. Scale bars are 10 μm. **c**, Quantification of the average  
 252 Talin-I-YPet concentration at the muscle attachment sites (MAS) per image. Note that the concentration  
 253 increases about 2-fold from 20 to 24 h APF and 5-fold to 30 h. (Kolmogorov-Smirnov test, \*\*\*  $p<0.001$ ,  
 254  $n$ =number of pupae) **d**, Model of mechanical Talin engagement. In focal adhesions, 70% of the Talin molecules  
 255 are under force[12] while at muscle attachment sites *in vivo* less than 15% are mechanically engaged at any  
 256 given time. As more Talin is recruited during muscle attachment maturation, the proportion of mechanically-  
 257 engaged Talin molecules decreases even further.

258

259 To confirm this hypothesis, we estimated the density of Talin molecules on the membrane by  
 260 dividing the number of Talin molecules per pixel by the estimated membrane area in the

261 confocal volume (Fig. 4d, see Methods for details). This resulted in about 400, 700 and 2300  
262 Talin molecules per  $\mu\text{m}^2$  at 20 h, 24 h and 30 h APF, respectively, which corresponds to  
263 20 nm x 20 nm space per molecule at 30 h APF. This space can easily accommodate the size  
264 of a Talin head domain (about 4 nm x 10 nm) [34], and the estimated density is comparable to  
265 previous studies of integrins in focal adhesions [35].

266 By combining our force quantifications with the estimated Talin density at muscle  
267 attachment sites, we calculated the Talin-mediated tissue stress to be in the order of 0.4-  
268 0.5 kPa at 20-24 h APF (see methods for details). These values are remarkably close to a  
269 previously published stress estimate of 0.16 kPa determined by traction force microscopy in  
270 focal adhesions of cultured cells [36]. Thus, Talin does contribute a significant amount of  
271 tissue stress despite the small proportion of mechanically engaged molecules (Fig. 4d).

272

## 273 **Discussion**

274 Our findings highlight the importance of investigating tissues in their natural mechanical  
275 environment *in vivo*. While the forces per Talin molecule and the tissue stress *in vivo* are in  
276 the same order of magnitude as in previous *in vitro* studies of focal adhesions [11,12,36], a  
277 surprisingly small proportion of Talin molecules (<15%) experience detectable forces during  
278 muscle development *in vivo*. An obvious question arising from our finding is: What are the  
279 other Talin molecules doing at muscle attachment sites, for which we cannot detect significant  
280 mechanical forces? Likely, the pool of mechanically engaged Talin molecules exchanges  
281 dynamically with the other Talin molecules present at the muscle attachment site. Such a  
282 dynamic system can allow the attachment to rapidly adjust to changes in tissue forces  
283 preventing rupture of the muscle-tendon attachment upon a sudden increase in tissue force.

284 It has been shown previously in focal adhesions of cultured cells, that the length of  
285 Talin can fluctuate dynamically on the time scale of seconds, with Talin being transiently  
286 extended from 50 nm up to 350 nm [37]. This can be explained with reversible folding and  
287 unfolding of some of the 13 helical bundles in the Talin rod upon actomyosin-dependent  
288 stretching of Talin. The unfolding of the helical bundles makes binding sites accessible  
289 leading to recruitment of vinculin [38]. The dynamic stretching of Talin could allow it to act  
290 as a ‘shock-absorber’ [25], consistent with our finding that only some molecules are under  
291 force at the same time, while additional molecules could be present to make the attachment  
292 robust against higher forces.

293 The forces required to unfold the Talin rod domains to enable vinculin binding are  
294 well within the range of the force sensors used here. The rod domain R3 unfolds at about  
295 5 pN [39] and the remaining rod domains unfold when forces larger than 8 pN are applied  
296 [40]. Hence, our force sensors detect biologically significant forces that change the Talin  
297 structure making vinculin binding sites accessible and allowing a mechanotransduction  
298 response.



299 Previous estimates of forces transmitted by integrins based on studies of focal  
300 adhesions *in vitro* cover a wide range of forces. Studies using extracellular sensors with  
301 synthetic integrin ligands (that report forces based on double-stranded DNA rupture) suggest  
302 that integrins can experience very high forces in cells plated on glass (more than 53 pN)  
303 [41,42]. However, other data generated with FRET-based extracellular sensors suggest that  
304 about 70% of the integrins in focal adhesions experience low forces (less than 3 pN) [43].  
305 While these *in vitro* systems have the advantage that they are accessible for precise  
306 manipulations, the artificial mechanical environment may have a strong impact on the amount  
307 of force experienced by the individual proteins and the number of molecules that are  
308 mechanically engaged. Our study provides, to our knowledge, the first insights into molecular  
309 forces acting on integrin-mediated attachments *in vivo*. Here we focus on developing muscle  
310 attachments in pupae, notably the built reagents should enable future force measurements in  
311 all integrin-based processes in *Drosophila*. Based on our finding that only a small proportion  
312 of Talin molecules (<15%) are experiencing forces higher than 6-8 pN at muscle attachments,  
313 we hypothesize that tissues prevent mechanical failure during development *in vivo* with the  
314 following mechanism: a large pool of molecules dynamically share the mechanical load, such  
315 that a sudden increase in tissue tension can be rapidly buffered by mechanically engaging  
316 additional molecules already present at the attachment site. Mechanical failure of integrin-  
317 mediated attachments *in vivo* needs to be avoided at all cost, particularly in muscle fibers or  
318 cardiomyocytes, to prevent fatal consequences for the animal. Hence, creating a buffer to  
319 withstand peak forces can be an important concept for the survival of animals.

320

## 321 **Methods**

### 322 **Fly strains**

323 All fly work was performed at 27°C to be consistent with previously published work, unless  
324 otherwise stated. For details on the genome engineering strategy resulting in Talin tension  
325 sensor and control stocks generated in this study (*talin-F40-TS*, *talin-C-F40-TS*, *talin-TS*,  
326 *talin-C-TS*, *talin-stTS*, *talin-C-stTS*, *talin-I-YPet*, *talin-C-YPet*, *talin-I-mCh*, and *talin-C-mCh*)  
327 see below. Other stocks used were *Mef2-GAL4* [44] and *UAS-mCherry-Gma* [45].

### 328 **Generation of tension sensor and control stocks**

329 Tension sensor and control stocks were generated by combining CRISPR/Cas9-mediated  
330 genome engineering with recombinase-mediated cassette exchange (RCME) as described  
331 previously [27]. See Extended Data Fig. 1 for a detailed depiction of the 2-step strategy. For  
332 step 1, single guide (sg)RNAs were designed with the help of an online tool maintained by the  
333 Feng Zhang lab (<http://crispr.mit.edu/>) [46] and transcribed *in vitro*. After testing sgRNA  
334 cutting efficiency in Cas9-expressing S2-cells [47], two sgRNAs (70 ng/μL) were injected  
335 into *Act5C-Cas9*, *Lig4<sup>169</sup>* embryos together with the dsRed donor vector (500 ng/μL)  
336 containing a dsRed eye marker cassette flanked by attP sites and homology arms. Successful  
337 homologous recombination events were identified by screening for red fluorescent eyes and  
338 verified by PCR and sequencing. “Ends-in” events were excluded. We call the resulting fly  
339 lines *talin-I-dsRed* and *talin-C-dsRed*. For step 2, vasa-φC31 plasmid (200 ng/μL) was  
340 injected together with attB-donor vector (150 ng/μL). Successful exchange events were  
341 identified by screening for the absence of dsRed and correct orientation of the cassette was  
342 verified by PCR.

343 **Adult hemithorax staining**

344 Adult hemithoraxes were dissected and stained in a similar way as previously described [48].  
345 Specifically, the wings and abdomen were cut off the thorax of adult males (1 day old) with  
346 fine scissors and the thoraxes were fixed for 15 min in 4% PFA in relaxing solution (20 mM  
347 sodium phosphate buffer, pH 7.0; 5 mM MgCl<sub>2</sub>; 5 mM ATP; 5 mM EGTA; 0.3% Triton-X-  
348 100). After washing once with PBST (PBS with 0.3% Triton-X-100), the thoraxes were  
349 placed on double-sided tape and the legs were cut off. Next, the thoraxes were cut sagittally  
350 with a microtome blade (dorsal to ventral). The thorax halves were placed in PBST, washed  
351 once and blocked in normal goat serum (1:30) for 30 min at room temperature (RT) on a  
352 shaker. Primary antibodies (anti-Talin antibody: 1:500, 1:1 mixture of E16B and A22A,  
353 DSHB) were incubated overnight at 4°C on a shaker. Hemithoraxes were then washed  
354 3x 10 min in PBST at RT and stained with secondary antibody (Alexa488 goat anti-mouse  
355 IgG, 1:500, Molecular Probes) and phalloidin (Rhodamine- or Alexa647-conjugate, 1:500 or  
356 1:200 respectively, Molecular Probes) in PBST for 2 hours at RT in the dark. After washing  
357 3x with PBST for 5 min, hemithoraxes were mounted in Vectashield containing DAPI with  
358 two spacer coverslips on each side. YPet signal after fixation was bright enough for imaging  
359 without further amplification.

360 **Dissection of pupae**

361 32 h APF pupae were freed from the pupal case and dissected in PBS in a silicone dish using  
362 insect pins [48]. The head and the sides were cut using fine scissors to remove the ventral half  
363 of the pupa. Next, the thorax was cut sagittally and the thorax halves were cut off the  
364 abdomen and placed in fixing solution (4% PFA in PBST) for 15 min. The thorax halves were  
365 then stained with phalloidin and DAPI like the adult hemithoraxes but without shaking and  
366 mounted using one spacer coverslip.

### 367 **Imaging of stainings**

368 Samples were imaged on a Zeiss LSM 780 scanning confocal microscope with Plan  
369 Apochromat objectives (10x air, NA 0.45 for overview images and 40x oil, NA 1.4 for detail  
370 images). For thick samples, a z-stack was acquired and maximum-projected using ImageJ.

### 371 **Sarcomere length quantification**

372 Sarcomere length was quantified as previously described using the ImageJ plug-in MyofibrilJ  
373 (<https://imagej.net/MyofibrilJ>) [28]. Briefly, an area with straight, horizontal myofibrils is  
374 analysed by Fourier transformation to find the periodicity of the sarcomeres. One area was  
375 analysed for each hemithorax stained with phalloidin and imaged at 40x and zoom 4.

### 376 **Western blotting**

377 Western blotting was performed according to standard procedures. Specifically, 15 flies each  
378 were homogenized in 100  $\mu$ L 6x SDS loading buffer (250 mM Tris pH 6.8, 30% glycerol, 1%  
379 SDS, 500 mM DTT) and heated to 95°C for 5 min. 200  $\mu$ L of water were added and the  
380 equivalent of 0.5 (10  $\mu$ L) and 1 fly (20  $\mu$ L) were loaded onto a NuPAGE Novex 3-8% Tris-  
381 Acetate Gel. The transfer to the membrane was carried out overnight. The membrane was  
382 blocked (5% blotting grade blocker, BioRad) and then incubated overnight with a 1:1 mixture  
383 of anti-Talin antibodies E16B and A22A (1:1000 in block). For detection, HRP anti-mouse  
384 antibody and Immobilon Western Chemiluminescent HRP Substrate (Millipore) were used.

### 385 **Flight assays**

386 Male flies (1-3 days old, aged at 25°C) were thrown into a 1 m x 8 cm plexiglass cylinder  
387 with 5 marked sections [49]. Flightless flies fall to the bottom of the tube immediately while  
388 strong fliers land in the top two sections and weak fliers in the 3<sup>rd</sup> and 4<sup>th</sup> section. Flight  
389 assays were performed in triplicates with 10-20 males each and repeated twice.

### 390 **Live imaging of embryos and larvae**

391 Embryos from the cross *yw*;; *talin-I-YPet* to *w*; *Mef2-GAL4*; *UAS-mCherry-Gma* were  
392 collected on apple juice agar plates for 24 hours and dechorionated in 50% bleach (0.024%  
393 hypochlorite) for 3 min. Living embryos were mounted in 50% glycerol before imaging. L3  
394 larvae from the same cross were immobilised by immersing them in 60°C water for about 1 s  
395 [29] and mounted using a plexiglass slide with a groove and one spacer coverslip on each side  
396 in 50% glycerol. 5x1 tile scan z-stacks were acquired using a 10x objective to image the  
397 entire larva.

### 398 **Isolation and differentiation of primary muscle fibers**

399 Primary cells were isolated from *Drosophila* embryos and differentiated as previously  
400 described [31,32] with the following modifications: Embryos (5-7 hours old, aged at 25°C)  
401 were collected from smaller cages on only one 9 cm molasses plate per genotype. Embryos  
402 were homogenized with a Dounce homogeniser using a loose fit pestle in 4 mL Schneider's  
403 *Drosophila* medium (Gibco 21720-024, lot 1668085) and after several washing steps (using  
404 2 mL medium) re-suspended to a concentration of  $3 \times 10^6$  cells/mL. Finally, cells were plated  
405 in 8-well ibidi dishes (1 cm<sup>2</sup> plastic bottom for microscopy with ibiTreat surface) coated with  
406 vitronectin (optional) at a density of  $3-9 \times 10^5$  cells/cm<sup>2</sup> and differentiated for 5-7 days at 25°C  
407 in a humid chamber.

### 408 **Fixation, staining and imaging of primary muscle fibers**

409 Primary muscle fibers were fixed on day 6 after isolation with 4% PFA in PBS for 10 min at  
410 RT on a shaker. Phalloidin-staining (Alexa647-conjugate, Molecular Probes) was performed  
411 overnight in the dark at 4°C. Fixed cells were imaged in PBS on a Zeiss LSM 780 with a 40x  
412 oil objective (Plan Apochromat, NA 1.4). Live imaging of twitching primary cells was

413 performed on a Leica SP5 confocal with a 63x water objective (HCX PL APO 63x/1.2 W  
414 CORR  $\lambda_{BL}$ ), acquiring the transmission light channel and the YPet channel simultaneously.

#### 415 **Sample preparation for live imaging of pupae**

416 White pre-pupae were collected and aged at 27°C to the desired time point. Before imaging, a  
417 window was cut into the pupal case above the thorax and the pupae were mounted on a  
418 custom-made slide with a groove as previously described [50].

#### 419 **Fluorescence lifetime imaging microscopy (FLIM)**

420 Primary muscle fibers and pupae were imaged live on a Leica SP5 microscope equipped with  
421 a pulsed white light laser (NKT Photonics, 80 MHz), a time-correlated single photon counting  
422 (TCSPC)-FLIM detector (FLIM X16, LaVision BioTec) and a 545/30 nm emission filter  
423 (Chroma). Primary muscle fibers were imaged with a 63x water objective (HCX PL APO  
424 63x/1.2 W CORR  $\lambda_{BL}$ ) and pupae were imaged with a 40x water objective (HC PL APO  
425 40x/1.1 W CORR CS2). Photon arrival times were detected with a resolution of 0.08 ns in a  
426 12.5 ns time window between laser pulses.

#### 427 **FLIM-FRET data analysis**

428 The FLIM data were analysed using a custom-written MATLAB program [11,12]. First, an  
429 intensity image was created to manually draw a region of interest (ROI) around the target  
430 structure (adhesions/costameres in primary cells or muscle attachment sites in pupae, also see  
431 Extended Data Fig. 2). To create a binary mask of the target structure, Multi-Otsu  
432 thresholding with three classes was applied to the signal in the ROI blurred with a median  
433 filter (3x3 pixels) and holes in the mask containing the brightest class were filled. Photon  
434 arrival times of all photons inside the mask were plotted in a histogram and the tail of the  
435 curve was fitted with a monoexponential decay yielding the fluorescence lifetime  $\tau$ . Fits with  
436 more than 5% relative error in lifetime determination were excluded from further analysis.

437 For dimmer samples (primary fiber cultures and intermolecular FRET pupae), we used a 10%  
438 relative error cut-off. The FRET efficiency  $E$  was calculated according to the following  
439 formula with  $\tau_{DA}$  being the lifetime of the donor in presence of the acceptor and  $\tau_D$  the  
440 lifetime of the donor alone:

$$441 \quad E = 1 - \frac{\tau_{DA}}{\tau_D} \quad (1)$$

442 For all measurements,  $\tau_D$  was determined using Talin-I-YPet. Experiments were repeated 2-5  
443 times on different experiment days with 10-15 pupae/cells imaged per genotype and day.

#### 444 **Calculation of the proportion of mechanically engaged Talin**

445 We determined the number of mechanically engaged (=open) tension sensor  $N_{open}$  relative to  
446 the total number of molecules  $N_{total}$  at the muscle attachment site using biexponential fitting  
447 similarly as previously described [12]. Briefly, we assumed that the fluorescence decay from  
448 a tension sensor FLIM measurement can be described by two lifetimes: The lifetime of the  
449 open sensor  $\tau_{noFRET}$  and the lifetime of the closed sensor undergoing FRET  $\tau_{FRET}$ . The lifetime  
450 of the open sensor  $\tau_{noFRET}$  approximately corresponds to the lifetime of the donor alone,  
451 because of the large contour length increase upon opening of the sensor. Thus, we determined  
452 the lifetime  $\tau_{noFRET}$  by using a monoexponential fit on Talin-I-YPet data as described above.  
453 The lifetime  $\tau_{FRET}$  was determined from zero-force control (Talin-C-TS) data. Since the  
454 Talin-C-TS sample contains fully fluorescent sensor ( $\tau_{FRET}$ ) and sensor with non-fluorescent  
455 mCherry acceptor ( $\tau_{noFRET}$ ), we used a biexponential fit with fixed  $\tau_{noFRET}$  to determine  $\tau_{FRET}$ .  
456 The two lifetimes  $\tau_{noFRET}$  and  $\tau_{FRET}$  were then fixed and used to fit Talin-TS and Talin-C-TS  
457 data biexponentially, thereby determining the relative contributions of photons from  
458 molecules with these two lifetimes. From this, the relative number of molecules with  $\tau_{noFRET}$   
459 and  $\tau_{FRET}$  was calculated, taking into account that FRET reduces the number of photons

460 detected in the donor channel. Finally, the ratio  $N_{open}/N_{total}$  was determined by normalizing the  
461 Talin-TS values to the respective Talin-C-TS values.

## 462 **Fluorescence correlation spectroscopy (FCS)**

463 Living *talin-I-YPet* pupae were analysed at 20 h, 24 h and 30 h APF by a combination of  
464 confocal microscopy (LSM 780, Zeiss) and FCS using a 40x water immersion objective (C-  
465 Apochromat 40x/1.20 W Korr UV-VIS-IR) and the built-in GaAsP detector in single photon  
466 counting mode. Prior to experiment, the correction collar and pinhole position were adjusted  
467 with fluorescent Rhodamine 6G in aqueous solution (30 nM in Tris pH 8) using the same type  
468 of cover glass (Marienfeld, High Precision, 18x18 mm, 170±5 µm thickness) as for mounting  
469 the pupae [50]. To calibrate the detection volume (excitation 514 nm laser light), we  
470 measured FCS (120 s recordings) at three different positions 20 µm above the cover glass  
471 surface. Autocorrelation curves were analysed with our open-source software *PyCorrFit* [51]  
472 (Version 1.0.1, available online at <http://pycorrfit.craban.de/>). For fitting Rhodamine 6G data  
473 we used a model accounting for triplet transitions and three-dimensional diffusion (denoted  
474 "T-3D" in *PyCorrFit*). The detection volume  $V_{eff}$  was calculated based on the measured  
475 diffusion time ( $\tau_{diff}$ ) and the published diffusion coefficient  $D = 414 \mu\text{m}^2/\text{s}$  [52]:

$$476 \quad V_{eff} = S \cdot (4\pi \cdot D \cdot \tau_{diff})^{3/2} \quad (2)$$

477 For all measurements, the axis ratio of the detection volume  $S = 5$  was consistently fixed [53].  
478 In living pupae, fluorescent proteins (YPet or Talin-I-YPet) were measured by FCS using a  
479 park and probe procedure [54]: In images, three positions in the muscle interior next to the  
480 muscle attachment site were manually selected for FCS (10x 40s recordings). For fitting of  
481 Talin-I-YPet autocorrelation curves (time bins > 1 µs), a two-component three-dimensional  
482 diffusion model with two non-fluorescent dark states (denoted "T+T+3D+3D" in *PyCorrFit*)  
483 was applied. Transient dark states were assigned either to triplet transitions ( $\tau_{trip1}$ ,  $T_1$ ) in the  
484 time range of 1-20 µs and photochemical flickering ( $\tau_{trip2}$ ,  $T_2$ ) in the time range of about 200-



485 600  $\mu\text{s}$  [55]. The first diffusion time was assigned to protein diffusion in the muscle interior  
486 whereas the second diffusion term was merely a descriptive term accounting for slow long tail  
487 behaviour that cannot be avoided in a crowded intracellular environment [54]. Autocorrelation  
488 curves derived from visibly unstable intensity traces were excluded from further analysis. Due  
489 to the high endogenous expression levels, the contribution of non-correlated background was  
490 negligible. Thus, the molecular brightness, i.e. the counts per particle (CPP) value of  
491 Talin-I-YPet was determined by dividing the average intensity  $I$  (brackets indicate the  
492 average) by the number of molecules in the focal volume  $N$ , which is dependent on the  
493 autocorrelation amplitude  $G(0)$  (of the autocorrelation function  $G(\tau)$ ) and the dark fractions  $T_1$   
494 and  $T_2$  from the fit:

$$495 \quad CPP = \frac{\langle I \rangle}{N} = \langle I \rangle \cdot G(0) \cdot (1 - T_1 - T_2) \quad (3)$$

496 Since freely diffusing YPet diffuses faster than Talin-I-YPet, the signal fluctuations related to  
497 flickering and diffusion cannot be distinguished in YPet measurements. Therefore, the  
498 autocorrelation curves of free YPet were fitted by a simplified model function accounting  
499 only for transient triplet states and two diffusive terms, of which the first combines  
500 contributions of both protein diffusion and flickering (denoted "T-3D-3D" in *PyCorrFit*). To  
501 estimate true particle numbers, we corrected for triplet transitions and flickering globally by  
502 using the average fractions  $T_1$  and  $T_2$  from corresponding Talin-I-YPet measurements  
503 performed with the same excitation power density:

$$504 \quad CPP_{YPet} = \frac{\langle I \rangle}{\langle N \rangle} = \langle I \rangle \cdot \langle G(0) \rangle \cdot \left( 1 - \langle T_{1,Talin-I-YPet} \rangle - \langle T_{2,Talin-I-YPet} \rangle \right) \quad (4)$$

505 The diffusion constant of freely expressed YPet was in good agreement to other fluorescent  
506 proteins in the cytoplasm of living cells, suggesting the point spread function positioned in the  
507 muscle cell is still diffraction limited. This finding justifies the external calibration of the  
508 detection volume by Rhodamine 6G.

## 509 **Calibration of confocal images**

510 For quantification of the Talin-I-YPet concentration at muscle-tendon attachment sites, the  
511 developing flight muscles were imaged in photon counting mode (512x512 px, pixel dwell  
512 time  $PT=50 \mu\text{s}$ ). Saturation of the detector was carefully avoided ( $I(x,y) < 2 \text{ MHz}$ ). The  
513 counts in each pixel of an image were calibrated by the molecular brightness (CPP) value  
514 determined for Talin-I-YPet in the interior of the same muscle fiber by FCS[54]. Due to the  
515 monomeric state of Talin-I-YPet, intensity values stored in each pixel  $I(x,y)$  could be directly  
516 transformed into numbers of Talin molecules:

$$517 \quad N(x, y) = \frac{I(x,y)}{CPP \cdot PT} \quad (5)$$

518 Using the Avogadro constant and the detection volume ( $V_{eff}$ ) as determined by Rhodamine 6G  
519 measurements, we then calculated concentration maps:

$$520 \quad c(x, y) = \frac{N(x,y)}{N_A \cdot V_{eff}} \quad (6)$$

521 Finally, the muscle attachment sites were isolated in the Talin-I-YPet concentration maps by  
522 creating a mask with the same thresholding algorithm as used for FLIM-FRET. The  
523 concentration values were averaged across pixels within the mask resulting in a mean  
524 concentration value per pupa.

## 525 **Estimation of Talin density and tissue stress**

526 To estimate Talin density on the membrane from pixel-by-pixel concentration values, we  
527 divided the average number of molecules in the focal volume at the muscle attachment sites  
528 by the membrane area in the focal volume. The focal volume was determined by  
529 Rhodamine 6G FCS measurements as described above. For the shape of the focal volume we  
530 assumed an ellipsoid with the long axis ( $z$ ) being 5-times the short axis ( $x=y$ ). Hence, for a  
531 focus volume of 0.32 fL, the membrane area in the  $z$ - $y$ -plane is  $0.63 \mu\text{m}^2$ . Taking into account  
532 that there are two membranes (one from the tendon and one from the muscle) and that the

533 membrane is not flat (ruffles approximately increase the area 2-fold as determined from EM-  
534 images [56]) the total membrane area in the focal volume is about  $2.5 \mu\text{m}^2$ .  
535 To estimate Talin-mediated tissue stress, we calculated *force threshold of sensor* x *Talin*  
536 *density* x *proportion of mechanically engaged Talin* =  $7 \text{ pN} \times 400 \text{ molecules}/\mu\text{m}^2 \times 13.2\% =$   
537  $0.37 \text{ kPa}$  for 20 h APF and  $7 \text{ pN} \times 700 \text{ molecules}/\mu\text{m}^2 \times 9.6\% = 0.47 \text{ kPa}$  for 24 h. Note, that  
538 these values are lower estimates since individual molecules might experience forces higher  
539 than 7 pN.

#### 540 **Statistics**

541 Box plots display the median as a red line and the box denotes the interquartile range.  
542 Whiskers extend to 1.5 times the interquartile range from the median and are shortened to the  
543 adjacent data point (Tukey). In addition, all data points are shown as dots. Tests used for  
544 statistical evaluation are indicated in the figure legends.

#### 545 **Code availability**

546 FLIM-FRET data was analysed using custom-written MATLAB code as published previously  
547 [11,12]. The code is available upon request.

## 548 **References**

- 549 1. Heisenberg C-P, Bellaïche Y. Forces in tissue morphogenesis and patterning. *CELL*.  
550 2013;153: 948–962. doi:10.1016/j.cell.2013.05.008
- 551 2. Lecuit T, Lenne P-F, Munro E. Force generation, transmission, and integration during  
552 cell and tissue morphogenesis. *Annual review of cell and developmental biology*.  
553 2011;27: 157–184. doi:10.1146/annurev-cellbio-100109-104027
- 554 3. Behrndt M, Salbreux G, Campinho P, Hauschild R, Oswald F, Roensch J, et al. Forces  
555 Driving Epithelial Spreading in Zebrafish Gastrulation. *Science*. 2012;338: 257–260.  
556 doi:10.1126/science.1224143
- 557 4. Rauzi M, Lenne P-F, Lecuit T. Planar polarized actomyosin contractile flows control  
558 epithelial junction remodelling. *Nature*. Nature Publishing Group; 2010;468: 1110–  
559 1114. doi:10.1038/nature09566
- 560 5. Engler AJ, Sen S, Sweeney HL, Discher DE. Matrix elasticity directs stem cell lineage  
561 specification. *CELL*. 2006;126: 677–689. doi:10.1016/j.cell.2006.06.044
- 562 6. Maître J-L, Turlier H, Illukkumbura R, Eismann B, Niwayama R, Nédélec F, et al.  
563 Asymmetric division of contractile domains couples cell positioning and fate  
564 specification. *Nature*. 2016;536: 344–348. doi:10.1038/nature18958
- 565 7. Nicklas RB. The forces that move chromosomes in mitosis. *Annu Rev Biophys*  
566 *Biophys Chem*. 1988;17: 431–449. doi:10.1146/annurev.bb.17.060188.002243
- 567 8. Nerger BA, Siedlik MJ, Nelson CM. Microfabricated tissues for investigating traction  
568 forces involved in cell migration and tissue morphogenesis. *Cell Mol Life Sci*. Springer  
569 International Publishing; 2017;74: 1819–1834. doi:10.1007/s00018-016-2439-z
- 570 9. Lemke SB, Schnorrer F. Mechanical forces during muscle development. *Mechanisms*  
571 *of Development*. The Authors; 2017;144: 92–101. doi:10.1016/j.mod.2016.11.003
- 572 10. Freikamp A, Cost A-L, Grashoff C. The Piconewton Force Awakens: Quantifying  
573 Mechanics in Cells. *Trends in Cell Biology*. 2016;26: 838–847.  
574 doi:10.1016/j.tcb.2016.07.005
- 575 11. Austen K, Ringer P, Mehlich A, Chrostek-Grashoff A, Kluger C, Klingner C, et al.  
576 Extracellular rigidity sensing by talin isoform-specific mechanical linkages. *Nature cell*  
577 *biology*. 2015;17: 1597–1606. doi:10.1038/ncb3268
- 578 12. Ringer P, Weißl A, Cost A-L, Freikamp A, Sabass B, Mehlich A, et al. Multiplexing  
579 molecular tension sensors reveals piconewton force gradient across talin-1. *Nature*  
580 *Methods*. 2017;14: 1090–1096. doi:10.1038/nmeth.4431
- 581 13. Grashoff C, Hoffman BD, Brenner MD, Zhou R, Parsons M, Yang MT, et al.  
582 Measuring mechanical tension across vinculin reveals regulation of focal adhesion  
583 dynamics. *Nature*. 2010;466: 263–266. doi:10.1038/nature09198
- 584 14. Borghi N, Sorokina M, Shcherbakova OG, Weis WI, Pruitt BL, Nelson WJ, et al. E-  
585 cadherin is under constitutive actomyosin-generated tension that is increased at cell-

- 586 cell contacts upon externally applied stretch. *Proceedings of the National Academy of*  
587 *Sciences*. 2012;109: 12568–12573. doi:10.1073/pnas.1204390109
- 588 15. Conway DE, Breckenridge MT, Hinde E, Gratton E, Chen CS, Schwartz MA. Fluid  
589 shear stress on endothelial cells modulates mechanical tension across VE-cadherin and  
590 PECAM-1. *Curr Biol*. 2013;23: 1024–1030. doi:10.1016/j.cub.2013.04.049
- 591 16. Kumar A, Ouyang M, Van den Dries K, McGhee EJ, Tanaka K, Anderson MD, et al.  
592 Talin tension sensor reveals novel features of focal adhesion force transmission and  
593 mechanosensitivity. *Journal of Cell Biology*. 2016;213: 371–383.  
594 doi:10.1083/jcb.201510012
- 595 17. Legendijk AK, Gomez GA, Baek S, Hesselson D, Hughes WE, Paterson S, et al. Live  
596 imaging molecular changes in junctional tension upon VE-cadherin in zebrafish.  
597 *Nature Communications*. Nature Publishing Group; 2017;8: 1402. doi:10.1038/s41467-  
598 017-01325-6
- 599 18. Krieg M, Dunn AR, Goodman MB. Mechanical control of the sense of touch by  $\beta$ -  
600 spectrin. *Nature cell biology*. 2014;16: 224–233. doi:10.1038/ncb2915
- 601 19. Röper J-C, Mitrossilis D, Stirnemann G, Waharte F, Brito I, Fernandez-Sanchez M-E,  
602 et al. The major  $\beta$ -catenin/E-cadherin junctional binding site is a primary molecular  
603 mechano-transducer of differentiation in vivo. *eLife*. 2018;7: 773.  
604 doi:10.7554/eLife.33381
- 605 20. Suzuki A, Badger BL, Haase J, Ohashi T, Erickson HP, Salmon ED, et al. How the  
606 kinetochore couples microtubule force and centromere stretch to move chromosomes.  
607 *Nature cell biology*. 2016;18: 382–392. doi:10.1038/ncb3323
- 608 21. Bökel C, Brown NH. Integrins in development: moving on, responding to, and sticking  
609 to the extracellular matrix. *Developmental Cell*. 2002;3: 311–321.
- 610 22. Sun Z, Guo SS, Fässler R. Integrin-mediated mechanotransduction. *The Journal of Cell*  
611 *Biology*. 2016;215: 445–456. doi:10.1083/jcb.201609037
- 612 23. Weitkunat M, Kaya-Copur A, Grill SW, Schnorrer F. Tension and force-resistant  
613 attachment are essential for myofibrillogenesis in *Drosophila* flight muscle. *Curr Biol*.  
614 2014;24: 705–716. doi:10.1016/j.cub.2014.02.032
- 615 24. Bunch TA, Salatino R, Engelsjerd MC, Mukai L, West RF, Brower DL.  
616 Characterization of mutant alleles of myospheroid, the gene encoding the beta subunit  
617 of the *Drosophila* PS integrins. *Genetics*. Genetics Society of America; 1992;132: 519–  
618 528.
- 619 25. Klapholz B, Brown NH. Talin - the master of integrin adhesions. *Journal of Cell*  
620 *Science*. The Company of Biologists Ltd; 2017;: jcs.190991–12.  
621 doi:10.1242/jcs.190991
- 622 26. Moser M, Legate KR, Zent R, Fassler R. The Tail of Integrins, Talin, and Kindlins.  
623 *Science*. 2009;324: 895–899. doi:10.1126/science.1163865
- 624 27. Zhang X, Koolhaas WH, Schnorrer F. A versatile two-step CRISPR- and RMCE-based  
625 strategy for efficient genome engineering in *Drosophila*. *G3 (Bethesda)*. 2014;4: 2409–

- 626 2418. doi:10.1534/g3.114.013979
- 627 28. Spletter ML, Barz C, Yeroslaviz A, Zhang X, Lemke SB, Bonnard A, et al. A  
628 transcriptomics resource reveals a transcriptional transition during ordered sarcomere  
629 morphogenesis in flight muscle. *eLife*. eLife Sciences Publications Limited; 2018;7:  
630 e34058. doi:10.7554/eLife.34058
- 631 29. Schnorrer F, Schönbauer C, Langer CCH, Dietzl G, Novatchkova M, Schernhuber K,  
632 et al. Systematic genetic analysis of muscle morphogenesis and function in *Drosophila*.  
633 *Nature*. 2010;464: 287–291. doi:10.1038/nature08799
- 634 30. Brown NH, Gregory SL, Rickoll WL, Fessler LI, Prout M, White RAH, et al. Talin is  
635 essential for integrin function in *Drosophila*. *Developmental Cell*. 2002;3: 569–579.
- 636 31. Perrimon N, Zirin J, Bai J. Primary cell cultures from *Drosophila* gastrula embryos.  
637 *JoVE*. 2011. doi:10.3791/2215
- 638 32. Bai J, Sepp KJ, Perrimon N. Culture of *Drosophila* primary cells dissociated from  
639 gastrula embryos and their use in RNAi screening. *Nat Protoc*. Nature Publishing  
640 Group; 2009;4: 1502–1512. doi:10.1038/nprot.2009.147
- 641 33. Bendig G, Grimmer M, Huttner IG, Wessels G, Dahme T, Just S, et al. Integrin-linked  
642 kinase, a novel component of the cardiac mechanical stretch sensor, controls  
643 contractility in the zebrafish heart. *Genes & Development*. 2006;20: 2361–2372.  
644 doi:10.1101/gad.1448306
- 645 34. Elliott PR, Goult BT, Kopp PM, Bate N, Grossmann JG, Roberts GCK, et al. The  
646 Structure of the talin head reveals a novel extended conformation of the FERM  
647 domain. *Structure*. 2010;18: 1289–1299. doi:10.1016/j.str.2010.07.011
- 648 35. Wiseman PW, Brown CM, Webb DJ, Hebert B, Johnson NL, Squier JA, et al. Spatial  
649 mapping of integrin interactions and dynamics during cell migration by image  
650 correlation microscopy. *Journal of Cell Science*. 2004;117: 5521–5534.  
651 doi:10.1242/jcs.01416
- 652 36. Plotnikov SV, Pasapera AM, Sabass B, Waterman CM. Force fluctuations within focal  
653 adhesions mediate ECM-rigidity sensing to guide directed cell migration. *CELL*.  
654 2012;151: 1513–1527. doi:10.1016/j.cell.2012.11.034
- 655 37. Margadant F, Chew LL, Hu X, Yu H, Bate N, Zhang X, et al. Mechanotransduction in  
656 vivo by repeated talin stretch-relaxation events depends upon vinculin. *PLoS Biol*.  
657 2011;9: e1001223. doi:10.1371/journal.pbio.1001223
- 658 38. del Rio A, Perez-Jimenez R, Liu R, Roca-Cusachs P, Fernandez JM, Sheetz MP.  
659 Stretching single talin rod molecules activates vinculin binding. *Science*. 2009;323:  
660 638–641. doi:10.1126/science.1162912
- 661 39. Yao M, Goult BT, Chen H, Cong P, Sheetz MP, Yan J. Mechanical activation of  
662 vinculin binding to talin locks talin in an unfolded conformation. *Sci Rep*. 2014;4:  
663 4610. doi:10.1038/srep04610
- 664 40. Yao M, Goult BT, Klapholz B, Hu X, Toseland CP, Guo Y, et al. The mechanical  
665 response of talin. *Nature Communications*. Nature Publishing Group; 2016;7: 11966.

- 666 doi:10.1038/ncomms11966
- 667 41. Wang X, Ha T. Defining single molecular forces required to activate integrin and notch  
668 signaling. *Science*. 2013;340: 991–994. doi:10.1126/science.1231041
- 669 42. Wang X, Sun J, Xu Q, Chowdhury F, Roein-Peikar M, Wang Y, et al. Integrin  
670 Molecular Tension within Motile Focal Adhesions. *Biophysical journal*. 2015;109:  
671 2259–2267. doi:10.1016/j.bpj.2015.10.029
- 672 43. Chang AC, Mekhdjian AH, Morimatsu M, Denisin AK, Pruitt BL, Dunn AR. Single  
673 Molecule Force Measurements in Living Cells Reveal a Minimally Tensioned Integrin  
674 State. *ACS Nano*. 2016;10: 10745–10752. doi:10.1021/acsnano.6b03314
- 675 44. Ranganayakulu G, Schulz RA, Olson EN. Wingless signaling induces nautilus  
676 expression in the ventral mesoderm of the *Drosophila* embryo. 1996;176: 143–148.  
677 doi:10.1006/dbio.1996.9987
- 678 45. Millard TH, Martin P. Dynamic analysis of filopodial interactions during the zippering  
679 phase of *Drosophila* dorsal closure. *Development*. 2008;135: 621–626.  
680 doi:10.1242/dev.014001
- 681 46. Cong L, Ran FA, Cox D, Lin S, Barretto R, Habib N, et al. Multiplex Genome  
682 Engineering Using CRISPR/Cas Systems. *Science*. 2013;339: 819–823.  
683 doi:10.1126/science.1231143
- 684 47. Böttcher R, Hollmann M, Merk K, Nitschko V, Obermaier C, Philippou-Massier J, et  
685 al. Efficient chromosomal gene modification with CRISPR/cas9 and PCR-based  
686 homologous recombination donors in cultured *Drosophila* cells. 2014;42: e89.  
687 doi:10.1093/nar/gku289
- 688 48. Weitkunat M, Schnorrer F. A guide to study *Drosophila* muscle biology. *METHODS*.  
689 2014;68: 2–14. doi:10.1016/j.ymeth.2014.02.037
- 690 49. Dietzl G, Chen D, Schnorrer F, Su K-C, Barinova Y, Fellner M, et al. A genome-wide  
691 transgenic RNAi library for conditional gene inactivation in *Drosophila*. *Nature*.  
692 2007;448: 151–156. doi:10.1038/nature05954
- 693 50. Lemke SB, Schnorrer F. In Vivo Imaging of Muscle-tendon Morphogenesis in  
694 *Drosophila* Pupae. *JoVE*. 2018;: e57312–e57312. doi:10.3791/57312
- 695 51. Müller P, Schwille P, Weidemann T. PyCorrFit-generic data evaluation for  
696 fluorescence correlation spectroscopy. *Bioinformatics*. 2014;30: 2532–2533.  
697 doi:10.1093/bioinformatics/btu328
- 698 52. Müller CB, Loman A, Pacheco V, Koberling F, Willbold D, Richtering W, et al.  
699 Precise measurement of diffusion by multi-color dual-focus fluorescence correlation  
700 spectroscopy. *Europhys Lett*. IOP Publishing; 2008;83: 46001–6. doi:10.1209/0295-  
701 5075/83/46001
- 702 53. Weidemann T. Application of fluorescence correlation spectroscopy (FCS) to measure  
703 the dynamics of fluorescent proteins in living cells. *Methods Mol Biol*. 2014;1076:  
704 539–555. doi:10.1007/978-1-62703-649-8\_24

- 705 54. Weidemann T, Wachsmuth M, Knoch TA, Müller G, Waldeck W, Langowski J.  
706 Counting nucleosomes in living cells with a combination of fluorescence correlation  
707 spectroscopy and confocal imaging. *Journal of Molecular Biology*. 2003;334: 229–240.  
708 doi:10.1016/j.jmb.2003.08.063
- 709 55. Steiert F, Petrov EP, Schultz P, Schwille P, Weidemann T. Photophysical Behavior of  
710 mNeonGreen, an Evolutionarily Distant Green Fluorescent Protein. *Biophysical*  
711 *journal*. 2018;114: 2419–2431. doi:10.1016/j.bpj.2018.04.013
- 712 56. Reedy MC, Beall C. Ultrastructure of developing flight muscle in *Drosophila*. II.  
713 Formation of the myotendon junction. 1993;160: 466–479.  
714 doi:10.1006/dbio.1993.1321

715

## 716 **Acknowledgements**

717 This work was supported by the EMBO Young Investigator Program (F.S.), the European  
718 Research Council under the European Union's Seventh Framework Programme (FP/2007-  
719 2013)/ERC Grant 310939 (F.S.), the Max Planck Society (S.B.L., T.W., A.-L.C., C.G, F.S.),  
720 the Centre National de la Recherche Scientifique (CNRS) (F.S.), the excellence initiative Aix-  
721 Marseille University AMIDEX (ANR-11-IDEX-0001-02, F.S.), the LabEX-INFORM (ANR-  
722 11-LABX-0054, F.S.), the ANR-ACHN (F.S.), the Human Frontiers Science Program (HFSP,  
723 F.S.), the Bettencourt Foundation (F.S.), the Boehringer Ingelheim Fonds (S.B.L.), the  
724 German Research Council (DFG) priority program SPP1782 (C.G.) and a Human Frontier  
725 Science Program Grant (RGP0024, C.G).

726 The authors are indebted to Carleen Kluger (initial software development for FLIM-  
727 FRET data analysis), Paul Müller (PyCorrFit software development), Bettina Stender, Nicole  
728 Plewka, Christophe Pitaval and Céline Guichard (fly embryo injections), Xu Zhang (two-step  
729 CRISPR/RMCE protocol), Petra Schwille (access to FCS-equipment) and Reinhard Fässler  
730 (continuous support).

## 731 **Author contributions**

732 S.B.L. performed all the experiments, with support from T.W. for the FCS experiments.  
733 S.B.L. analysed all the data with help from A.-L.C. and generated the figures. A.-L.C. refined



734 FLIM analysis software. F.S. conceived and supervised the project with essential input from  
735 C.G. throughout the project. S.B.L. and F.S. wrote the manuscript with input from all authors.

### 736 **Competing interests**

737 The authors declare no competing interests.

### 738 **Data availability statement**

739 The authors declare that the relevant data supporting the findings of this study are included  
740 within the paper. Additional data are available upon request to the corresponding authors.

### 741 **Correspondence & Materials**

742 Correspondence and requests for materials should be addressed to F.S, C.G or S.B.L.

743

744

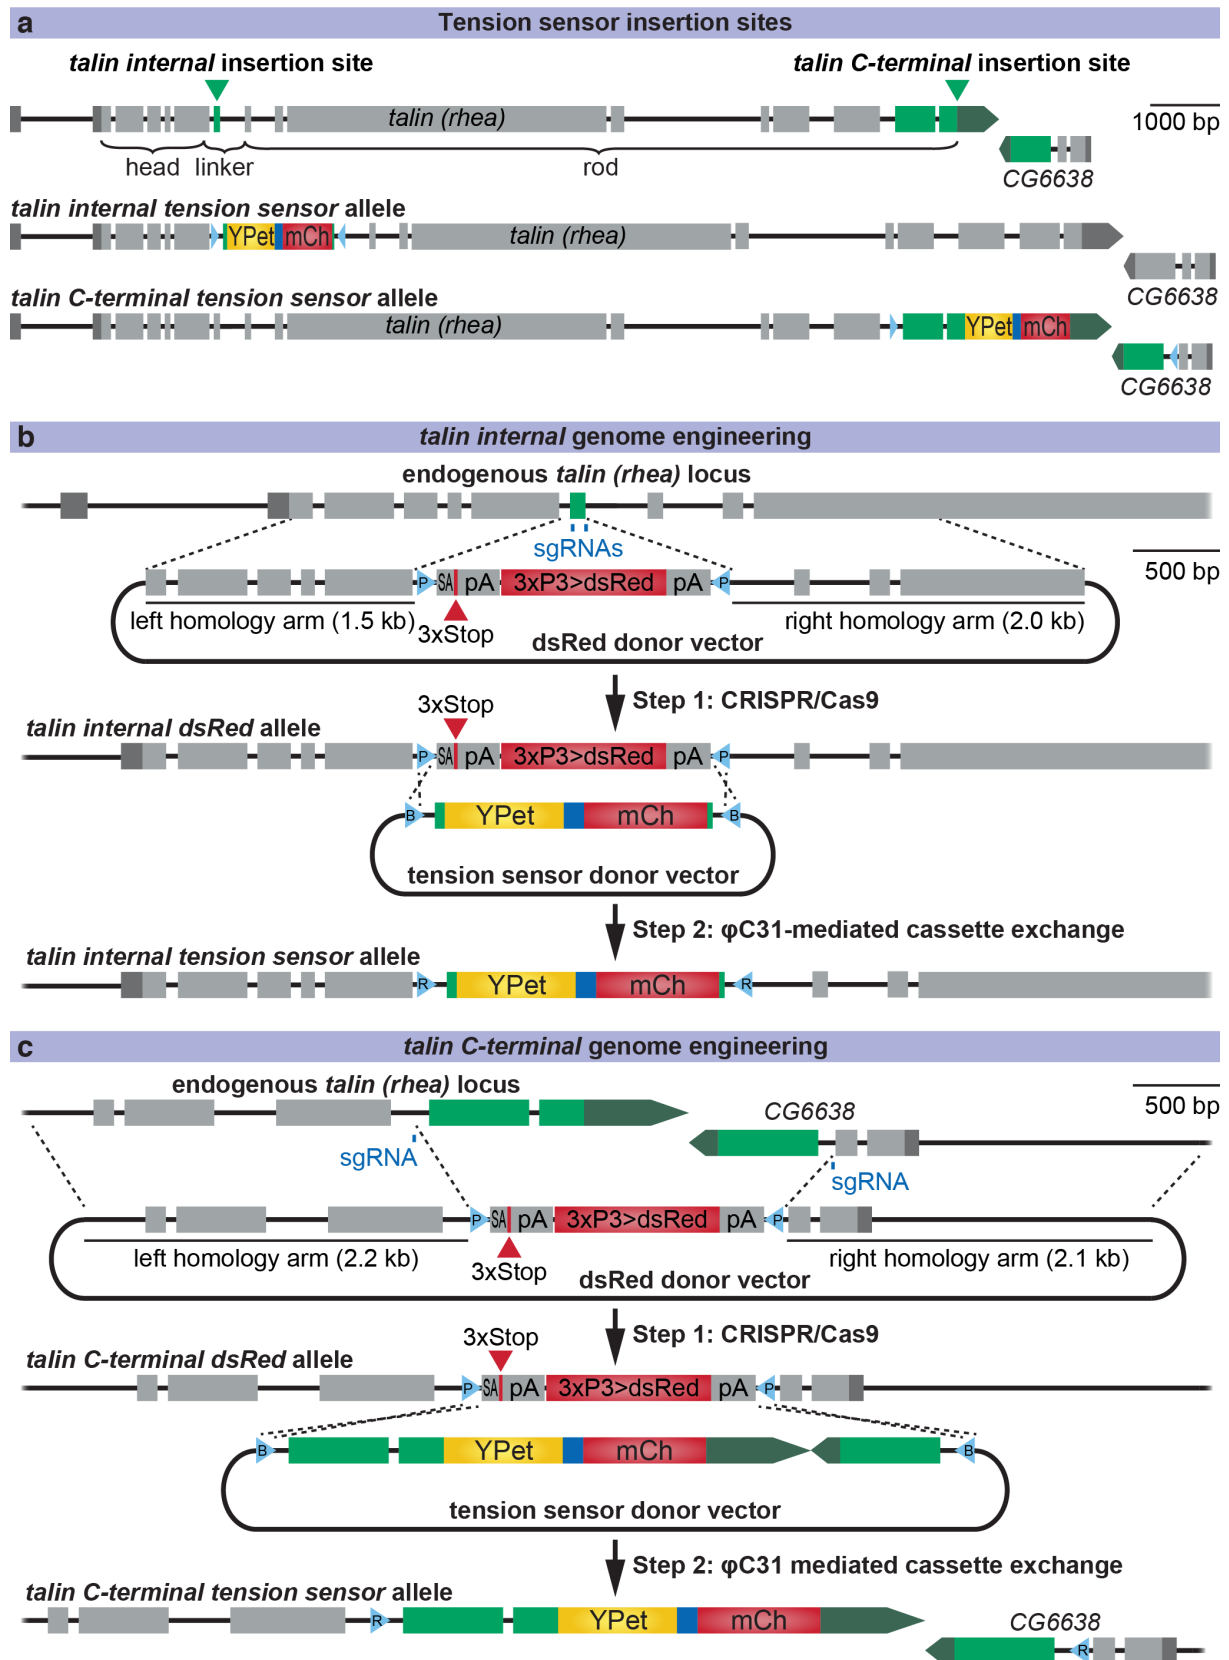

745

746 **Extended Data Fig. 1 | Talin tension sensor genome engineering.** **a, Top:** Gene model of *tal in (rhea, isoform*  
 747 *RF)* with the insertion sites (green) in the linker region between Talin head and rod (internal), and at the C-  
 748 terminus. The gene *CG6638* immediately follows *tal in* and therefore was included, too. **Middle:** Tension sensor  
 749 allele with the sensor module inserted into the target exon in the linker region of Talin. attR sites left in the  
 750 surrounding introns are shown in light blue. **Bottom:** C-terminal control sensor allele with the sensor module  
 751 inserted at the C-terminus of Talin. Gene models are drawn to scale. **(b)** Scheme showing how tension sensor

34

752 alleles were generated. **Step 1:** The target exon in the linker region (green) was replaced by a splice acceptor  
753 (SA)-3xStop-SV40 terminator (pA)-3xP3>dsRed-pA cassette flanked by attP sites (P) using the CRISPR/Cas9  
754 system. Specifically, a dsRed donor vector containing 1.5 to 2.0 kb homology arms was injected into *Act5C*-  
755 Cas9 expressing embryos (also carrying a *lig4*<sup>169</sup> mutation to favour homology directed repair over non-  
756 homologous end-joining [27]) together with two *in vitro*-transcribed single guide (sg)RNAs (target sites in blue).  
757 Successful targeting was identified by screening for fluorescent red eyes. **Step 2:**  $\phi$ C31-mediated cassette  
758 exchange was performed to replace the dsRed cassette by the original target exon including a tension sensor  
759 module consisting of YPet, a flexible calibrated, mechano-sensitive linker peptide (dark blue) and mCherry  
760 (mCh). To this end, a tension sensor donor vector including flanking attB sites (B) was injected together with  
761 *vasa*- $\phi$ C31 plasmid. Thereby, the tension sensor was inserted seamlessly into the gene (after Talin amino acid  
762 456) except for two attR sites (R) in the flanking introns. Successful exchange events were identified by  
763 screening for the absence of fluorescent red eyes [27]. Control fly lines with one fluorophore and fly lines with  
764 different tension sensor modules were generated by repeating step 2 with different donor vectors. **(C)** Scheme  
765 showing how C-terminal zero-force sensor alleles were generated using the same strategy. However, at the C-  
766 terminus three exons (green) were replaced by the dsRed cassette in the first step, because the last intron in *talin*  
767 is small and the gene *CG6638* follows immediately after *talin*. All three exons were put back in the second step  
768 together with the sensor module resulting in one attR site in a *talin* intron and one in an *CG6638* intron.  
769 Respective controls with the individual fluorophores were also generated.  
770  
771

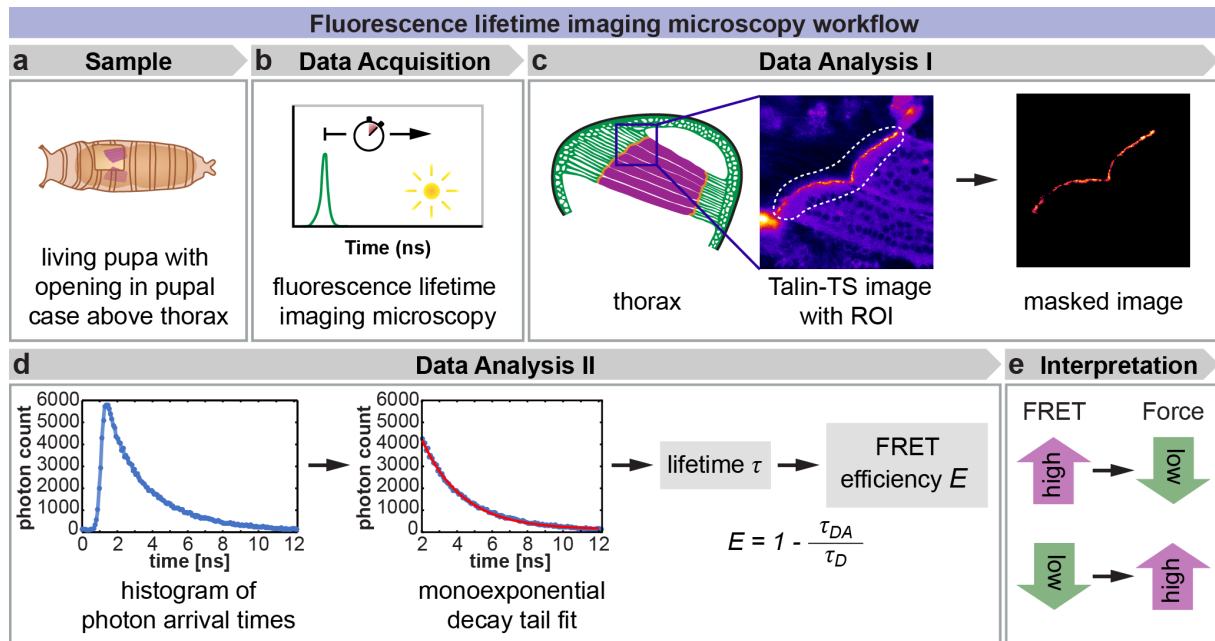

772  
773  
774 **Extended Data Fig. 2 | Fluorescence lifetime imaging microscopy workflow.** a, Living *talin-TS* or control  
775 pupae were prepared for imaging by opening a window in the pupal case above the thorax containing the  
776 developing flight muscles (magenta)[50]. b, Fluorescence lifetime imaging microscopy (FLIM) was performed  
777 on a confocal microscope equipped with a pulsed laser (indicated by green peak) for exciting the donor  
778 fluorophore (YPet) and a time-correlated single photon counting (TCSPC)-detector for recording photon arrival  
779 times (indicated by yellow dot). c, A YPet intensity image created from the FLIM data was used to manually  
780 draw a region of interest (ROI) containing the anterior muscle attachment sites of the dorso-longitudinal flight  
781 muscles close to the surface of the thorax. From this ROI a mask for the muscle attachment sites was created by  
782 Multi-Otsu thresholding. d, Photon arrival times of all photons inside the mask were plotted in a histogram. The  
783 tail of the curve was fitted by a monoexponential decay to determine the lifetime  $\tau$ . By comparing the lifetime of  
784 the Talin tension sensor  $\tau_{DA}$  with the lifetime of respective donor-only control  $\tau_D$ , the FRET efficiency  $E$  was  
785 calculated. e, Interpretation of FRET results: A high FRET efficiency indicates mostly closed sensor modules  
786 and therefore low force. Vice versa, a low FRET efficiency indicates mostly open sensor modules and therefore  
787 high force.  
788

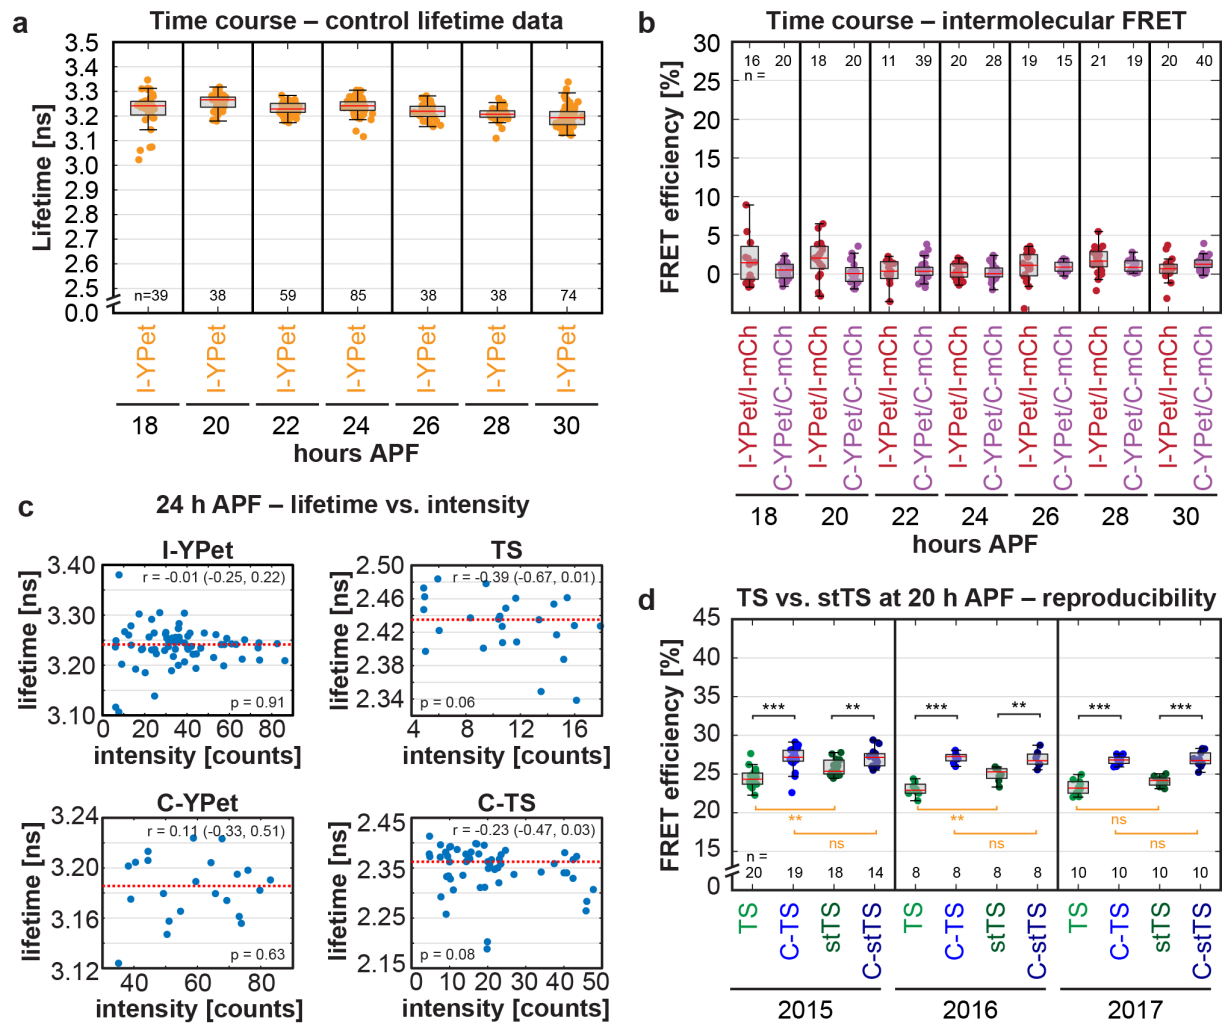

789  
790  
791  
792  
793  
794  
795  
796  
797  
798  
799  
800  
801  
802  
803

**Extended Data Fig. 3 | Control measurements for Talin forces detected at muscle attachment sites *in vivo*.**  
**a**, Lifetime data of donor only controls at the internal position of Talin (I-YPet) **b**, Intermolecular FRET data measured by comparing heterozygous I-YPet/I-mCh or C-YPet/C-mCherry pupae to homozygous I-YPet or C-YPet pupae, respectively. Intermolecular FRET is negligible at all time points. **c**, Lifetime data for I-YPet, C-YPet, TS and C-TS at 24 h APF for each pupa plotted against the average intensity inside its muscle attachment site mask. Red dotted line represents median lifetime value. No correlation between lifetime and intensity could be detected (Pearson correlation coefficient  $r$  with 95% confidence interval and  $p$ -values are indicated). **d**, Reproducibility of FLIM-FRET measurements performed in different years: TS and its stable variant stTS show a reproducible decrease in FRET efficiency compared to the C-terminal zero-force controls C-TS and C-stTS at 20 h APF (Kolmogorov-Smirnov test, \*\*\*  $p < 0.001$ , \*\*  $p < 0.01$ , ns=not significant  $p > 0.05$ ;  $n$ =number of pupae).

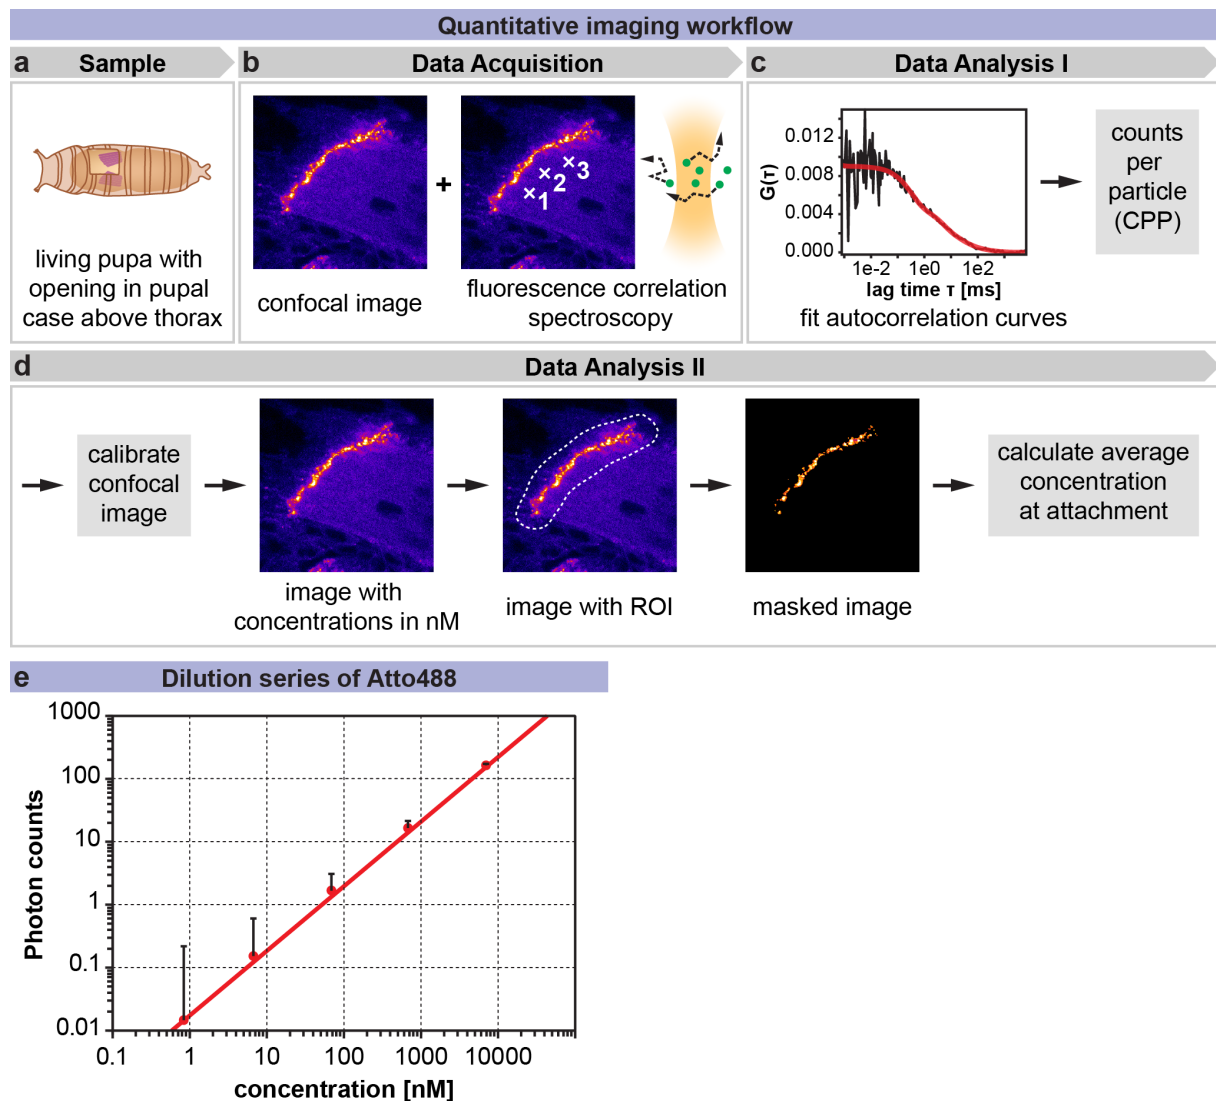

804  
805  
806  
807  
808  
809  
810  
811  
812  
813  
814  
815  
816  
817

**Extended Data Figure 4. Quantitative imaging workflow and control measurements for fluorescence correlation spectroscopy (FCS).** **a**, Living *talin-I-YPet* pupae were prepared for quantitative imaging by opening a window in the pupal case above the thorax containing the developing flight muscles (magenta)[50]. **b**, A confocal image and three FCS measurements were acquired using the same detector on a confocal microscope. **c**, Autocorrelation curves from the FCS measurements were fit to obtain a counts per particle (CPP) value for each pupa. **d**, The CPP value was used to calibrate each image resulting in a pixel-by-pixel concentration image. This image was used to manually draw an ROI around the muscle attachment site. From this ROI a muscle attachment mask was created automatically by Multi-Otsu thresholding. Finally, the average concentration at the attachment was calculated from the pixel-values inside the mask for each pupa. **e**, Pixel-by-pixel photon count values measured in an Atto488 dye dilution series (mean with standard deviation). Note that the photon count values increase linearly with the concentration of the dye for the entire range measured.

818 **Supplemental Video 1 – Legend**

819 Video of twitching primary muscle fiber shown in Fig. 2f. Talin-I-YPet signal (green) is  
820 overlaid with the transmission light channel (grey) acquired simultaneously. The length of the  
821 movie is 1 min with a time resolution of 1.29 s played at 10x speed.

822
